1           **An expanded phylogeny of *Setaria* (Poaceae, Panicoideae,**  
2 **Paniceae) and its relationships within the subtribe Cenchrinae**

3

4           Carolina Delfini<sup>1,\*</sup>, Juan M. Acosta<sup>1</sup>, José F. Pensiero<sup>2</sup>, Sandra S. Aliscioni<sup>1,3</sup>

5

6           <sup>1</sup> Instituto de Botánica Darwinion (ANCEFN–CONICET), San Isidro, Buenos Aires, Argentina.

7           <sup>2</sup> Instituto de Ciencias Agropecuarias del Litoral, UNL–CONICET–FCA, Esperanza, Santa Fe,  
8 Argentina.

9           <sup>3</sup> Cátedra de Botánica General, Facultad de Agronomía, Universidad de Buenos Aires, Buenos  
10 Aires, Argentina.

11

12           \* Corresponding author

13           E-mail: [cdelfini@darwin.edu.ar](mailto:cdelfini@darwin.edu.ar) (CD).

14

15           **Author contributions:**

16           **Conceptualization:** Carolina Delfini, Sandra S. Aliscioni.

17           **Formal analysis:** Carolina Delfini.

18           **Investigation:** Carolina Delfini, José F. Pensiero, Sandra S. Aliscioni.

19           **Funding acquisition:** Juan M. Acosta.

20           **Methodology:** Carolina Delfini, Juan M. Acosta.

21           **Supervision:** Sandra S. Aliscioni.

22           **Writing – original draft preparation:** Carolina Delfini, Sandra S. Aliscioni.

23

24           **Key words:** Bristle clade, *ndhF*, *Paspalidium*, *Paurochaetium*, *Reverchoninae*.

## 25 **Abstract**

26 *Setaria* P. Beauv. is the largest genus of the “bristle clade”, including between 115 and 160  
27 species. Previous molecular phylogenetic studies showed *Setaria* likely to be para- or polyphyletic,  
28 retrieving several clades apparently consistent in all analyses and correlated with the geographic  
29 origin of species. In this study, we evaluate the phylogeny of the subtribe Cenchrinae using  
30 parsimony, likelihood, and Bayesian inference based on the plastid marker *ndhF* and increasing the  
31 number of sampled species. Our main objective was analyze American taxa with inflorescences of  
32 the “Paspalidium type” (i.e., subgenera *Paurochaetium* and *Reverchoniae*) to test whether they, as  
33 traditionally circumscribed, form a natural group. Our findings recovered both subgenera as  
34 polyphyletic, with their species distributed in different morphologically distinctive clades and not  
35 necessarily correlated with the geographic origin. Additionally, we were able to include a second  
36 voucher of species that were imprecisely located in previous studies and define their placements in  
37 the tree, as well as confirm that *Setaria* is polyphyletic as currently delineated. A comparison with  
38 the results from other studies, comments on *Stenotaphrum* Trin. and a brief discussion on  
39 conflicting placements in the “Cenchrus clade”, and of *Acritochaete* Pilg. are also included here.

40

## 41 **Introduction**

42 *Setaria* P. Beauv. is a cosmopolitan genus of grasses comprising between 115 and 160  
43 species [1–2], commonly found in open environments and woodlands [2–5]. The species grow  
44 mostly in tropical and subtropical latitudes, though several are present in cold regions of both  
45 hemispheres [2–5]. The Old World species are concentrated in tropical Africa, including 12  
46 endemic to Madagascar [6–7], whereas in the New World the center of species diversity is Brazil  
47 [3] with 30 native [8–9].

48           *Setaria* is one of several genera in the subtribe Cenchrinae [10–12] that is characterized by  
49 having highly modified inflorescences with sterile branches, often known as setae or “bristles”  
50 persist when the spikelets fall at maturity [2, 5, 13]. Despite being a morphologically well-  
51 characterized genus, the phylogeny of *Setaria* and its related genera lacks resolution mainly in  
52 defining relationships among large clades [13–14]. The most complete phylogeny at the present  
53 [14] is based on the plastid marker *ndhF* and shows the genus likely to be para- or polyphyletic,  
54 with several moderately to strongly supported clades apparently consistent in all analyses [14].  
55 These clades represent lineages correlated basically to geographic distribution but, relationships  
56 among them are unclear. In addition, other small genera of Cenchrinae (e.g., *Ixophorus* Schltld.,  
57 *Setariopsis* Scribn. ex Millsp., *Spinifex* L., *Uranthoecium* Stapf, *Zygochloa* S.T. Blake, and  
58 *Zuloagaea* E. Bess) are consistently resolved within *Setaria*, making morphological affinities  
59 between the species even more difficult to establish [14]. Based on the preceding findings [14] plus  
60 new taxa added in [15], [13] presented a phylogeny of subtribe Cenchrinae, focusing on *Setaria*  
61 species. In this tree, four blocks including clades, groups of clades or ungrouped species are  
62 indicated and named by the geographic origin (i.e., 1. Africa, tropical-Asia, 2. Australia,  
63 Australasia, 3. temperate Asia, and 4. Americas). The lack of a well-resolved phylogeny along with  
64 the difficult morphological delimitation of some species mean that *Setaria* requires further in depth  
65 research. It is clearly not a natural group but more evidence is still needed to allow restructuring of  
66 the taxonomy of *Setaria* in association with the other genera within the subtribe Cenchrinae [13–  
67 14].

68           Previous authors have had differing opinions regarding the infrageneric classification of  
69 *Setaria*, but in general, one or two distinctive groups of species have been recognized and the  
70 remainder placed in subgenus/section *Setaria* [3, 5, 16]. For tropical Africa species, [6] recognized  
71 four sections, that is, *Eu-setaria* Stapf characterized by its young blades not plicate and panicles  
72 usually spike-like, *Ptychophyllum* (A. Braun) Stapf including plants with plicate blades and open

73 panicles, and sections *Panicatrix* Stapf & C.E. Hubb. and *Cymbosetaria* Stapf Hubb., distinguished  
74 by having rounded and keeled upper lemmas, respectively, and non-cylindrical inflorescences [6].  
75 In addition to these four, [16] also recognized section *Setaria*, characterized by the blades not  
76 plicate and bristles usually below all the spikelets.

77 Using similar criteria and also based on the position of the bristles along the inflorescences,  
78 [3] recognized three subgenera for the North American species: *Setaria*, *Ptychophyllum* and  
79 *Paurochaetium* (Hitc. & Chase) Rominger, which groups species with bristles present only at the  
80 ends of primary branches. [5], in his treatment of the South American species, recognized the  
81 subgenera *Setaria*, *Ptychophyllum* and proposed the new monotypic subgenus *Cernatum* Pensiero,  
82 to accommodate *Setaria cernua* Kunth, whose position in the infrageneric classification had long  
83 been uncertain.

84 In some species, the primary branches of the inflorescence are themselves unbranched (i.e.,  
85 the spikelets are born directly on the primary branches) and these branches end in a bristle [2]. The  
86 Old World species with this type of inflorescences, called informally “Paspalidium type”, were  
87 placed in the genus *Paspalidium* Stapf. [17]. However, American species with similar type of  
88 inflorescences were treated in three different subgenera within *Setaria*: *Paurochaetium*,  
89 *Reverchoniae* W.E. Fox (segregated from subgenus *Paurochaetium*), and *Cernatum* [3, 5, 18].

90 Advances in morphological and systematic studies in *Setaria* have shown that there is  
91 another type of inflorescence in which some other spikelets (but not all) are associated with bristles  
92 in addition to the uppermost ones in the branch tip, although the general pattern is similar to the  
93 “Paspalidium type” [2, 13]. The recognition of this intermediate pattern led to the transfer of Old  
94 World *Paspalidium* species back to *Setaria* [1–2, 19–20], a result partially supported by molecular  
95 phylogenies [10–12, 14], and morphological and foliar anatomical data [21].

96 *Setaria* is currently recognized as a difficult and non-monophyletic genus; its species are  
97 isolated or segregate into many clades in the subtribe Cenchrinae and none of the tested subgenera

98 (i.e., *Ptychophyllum* (A. Braun) Hitchc. and *Setaria*) are monophyletic. Besides the monotypic  
99 South American subgenus *Cernatum* analyzed by [14], whose placement conflicts in different  
100 analyses and is, up to now, unresolved, none American *Setaria* species with a “Paspalidium type”  
101 inflorescence (i.e., subgenera *Paurochaetium* and *Reverchoniae*) were sampled in existing  
102 phylogenies. Based on these previous results, our principal objective was include species of the  
103 subgenera *Paurochaetium* and *Reverchoniae* to test their positions, assuming a priori that these  
104 subgenera either would be resolved within the "American groups" due to their geographic origin, or  
105 related to species originally considered as *Paspalidium*, given their morphological similarities.  
106 Additionally, we added *ndhF* sequences of Old World species of *Setaria* and other genera of  
107 Cenchrinae from Genbank not considered in previous phylogenies [14]. We included new  
108 sequences of some other American species of *Setaria* (not *Paurochaetium* and *Reverchoniae*) and a  
109 new second voucher of some species that were imprecisely located in [14], as they were represented  
110 by partial, not fully double-stranded and/or poor-quality accessions, and their positions in the tree  
111 are now defined.

112

## 113 **Material and Methods**

### 114 **Taxon sampling**

115 The aligned data matrix used in the phylogenetic analyses includes a total of 178 accessions,  
116 of which 170 are ingroup corresponding to the subtribe Cenchrinae (Table 1). The chloroplast DNA  
117 (cpDNA) *ndhF* matrix previously published [14], excluding the outgroup, was augmented with 61  
118 new sequences, of which 32 are *Setaria* (Table 1). Of these, we have sequenced 18 that  
119 corresponding to species of the subgenera *Paurochaetium* and *Reverchoniae* (Table 2) plus those  
120 without a defined placement in [14] (Table 1, indicated with \*\*). Eight species belonging to six  
121 closely related genera were selected as outgroup, based on [10, 14]: *Aakia* J.R. Grande, *Eriochloa*  
122 Kunth, *Moorochloa* Veldkamp, *Panicum* L, *Rupichloa* Salariao & Morrone, and *Urochloa* P.

123 Beauv. Information about vouchers and accession numbers of the new sequences obtained for this  
124 study and those available in GenBank are given in Table 1.

125 **Table 1. Taxa, voucher information, and GenBank accession numbers for *ndhF* sequences.**

| <b>Ingroup taxa (Cenchrinae)</b>            | <b>Voucher information</b>                                          | <b>GenBank accession</b> |
|---------------------------------------------|---------------------------------------------------------------------|--------------------------|
| <i>Acritochaete volkensis</i> Pilg.*        | Guinea, North Bioko, <i>M. Carvalho 3691</i> (G)                    | HE573491                 |
| <i>Alexfloydia repens</i> B.K. Simon*       | Locality not indicated, <i>S.J. &amp; T.R. Hodkinson 9391</i> (TCD) | HE573538                 |
| <i>Cenchrus abyssinicus</i> (Hack.) Morrone | Ethiopia, Shewa, <i>G. Aweke 2912</i> (MO)                          | EU741938                 |
| <i>Cenchrus alopecuroides</i> Thunb.        | Published GenBank sequence from [25]                                | AY029672                 |
| <i>Cenchrus americanus</i> (L.) Morrone     | Published GenBank sequence from [26]                                | AF499149                 |
| <i>Cenchrus caliculatus</i> Cav.            | Published GenBank sequence from [27]                                | EF189886                 |
| <i>Cenchrus caudatus</i> (Schrad.) Kuntze   | South Africa, Mpumalanga, <i>E.A. Kellogg 1123</i> (MO)             | EU741936                 |
| <i>Cenchrus ciliaris</i> L. (1)             | Published GenBank sequence from [25]                                | AY029625                 |
| <i>Cenchrus ciliaris</i> L. (2)             | South Africa, Mpumalanga, <i>E.A. Kellogg 1125</i> (MO)             | EU741937                 |
| <i>Cenchrus echinatus</i> L.                | Published GenBank sequence from [26]                                | AF499151                 |
| <i>Cenchrus flaccidus</i> (Griseb.) Morrone | Published GenBank sequence from [26]                                | AF499150                 |
| <i>Cenchrus longisetus</i> M.C. Johnst.     | Published GenBank sequence from [27]                                | EF189888                 |
| <i>Cenchrus mutilatus</i> Kuntze            | Published GenBank sequence from [28]                                | AY188498                 |
| <i>Cenchrus myosuroides</i> Kunth           | Published GenBank sequence from [26]                                | AF499152                 |

|                                                     |                                                                                 |          |
|-----------------------------------------------------|---------------------------------------------------------------------------------|----------|
| <i>Cenchrus pilosus</i> Kunth                       | Published GenBank sequence from [27]                                            | EF189887 |
| <i>Cenchrus setaceus</i> (Forssk.) Morrone          | Published GenBank sequence from [25]                                            | AY029673 |
| <i>Cenchrus setiger</i> Vahl                        | Published GenBank sequence from [26]                                            | AF499153 |
| <i>Chamaeraphis hordeacea</i> R. Br.*               | Published GenBank sequence from [10]                                            | JN604680 |
| <i>Dissochondrus biflorus</i> (Hildebr.) Kuntze*    | Published GenBank sequence from [10]                                            | JN604686 |
| <i>Hygrochloa aquatica</i> Lazarides*               | Published GenBank sequence from [10]                                            | JN604690 |
| <i>Ixophorus unisetus</i> (J. Presl) Schltl. (1)    | Published GenBank sequence from [29]                                            | AY623749 |
| <i>Ixophorus unisetus</i> (2)                       | Mexico, Michoacán, <i>O. Morrone 3638</i> (SI)                                  | EU741940 |
| <i>Panicum antidotale</i> Retz.*                    | Argentina, Jujuy, <i>F.O. Zuloaga 7091</i> (SI)                                 | AY188456 |
| <i>Paractaenum novae-hollandiae</i> P. Beauv.*      | Published GenBank sequence from [10]                                            | JN604697 |
| <i>Paratheria prostrata</i> Griseb.*                | Published GenBank sequence from [10]                                            | JN604699 |
| <i>Plagiosetum refractum</i> (F. Muell.) Benth. (1) | Australia, locality not indicated, <i>S. Jacobs 9600</i> (NSW)                  | EU819409 |
| <i>Plagiosetum refractum</i> (2)*                   | Australia, locality not indicated, <i>S.J. &amp; T.R. Hodgkinson 9600</i> (TDC) | HE573564 |
| <i>Pseudochaetochloa australiensis</i> Hitchc.*     | Published GenBank sequence from [10]                                            | JN604702 |
| <i>Pseudoraphis paradoxa</i> (R. Br.) Pilg.         | Published GenBank sequence from [27]                                            | EF189892 |
| <i>Pseudoraphis spinescens</i> (R. Br.) Vickery*    | Published GenBank sequence from [30]                                            | MF998495 |



|                                                      |                                                                    |          |
|------------------------------------------------------|--------------------------------------------------------------------|----------|
| <i>Setaria albovillosa</i> (S.T. Blake) R.D. Webster | Australia, Queensland, <i>Clarkson &amp; Henderson 7926</i> (CANB) | EU741984 |
| <i>Setaria alonsoi</i> Pensiero & Anton              | Argentina, Córdoba, <i>J. Pensiero 6973</i> (SF)                   | EU741943 |
| <i>Setaria appendiculata</i> (Hack.) Stapf           | Namibia, locality not indicated, <i>Giess 13524</i> (WIND)         | EU747685 |
| <i>Setaria atrata</i> Hack. (1)                      | Ethiopia, Wollega, <i>Gilbert &amp; Thulin 729</i> (MO)            | EU747689 |
| <i>Setaria atrata</i> (2)*                           | Madagascar, locality not indicated, <i>RGD 196</i> (K)             | MF998497 |
| <i>Setaria barbata</i> (Lam.) Kunth (1)              | Published GenBank sequence from [27]                               | AF499145 |
| <i>Setaria barbata</i> (2)                           | Venezuela, Distrito Federal, <i>O. Morrone 4804</i> (SI)           | EU741944 |
| <i>Setaria basiclada</i> (Hughes) R.D. Webster       | Australia, South Australia, <i>Bates 46269</i> (AD)                | EU741978 |
| <i>Setaria cernua</i> Kunth (1)**                    | Ecuador, Pichincha, <i>S. Lægaard 70467</i> (MO)                   | EU741945 |
| <i>Setaria cernua</i> (2)*                           | Ecuador, Pichincha, <i>I. Grignon 84160</i> (MO)                   | xxxxxxx* |
| <i>Setaria chapmanii</i> (Vasey) Pilg.*              | Mexico, Quintana Roo, <i>G. Davidse 20121</i> (MO)                 | xxxxxxx* |
| <i>Setaria constricta</i> (Domin) R.D. Webster       | Australia, Western Australia, <i>Lepschi &amp; Lally 2643</i> (AD) | EU741979 |
| <i>Setaria distantiflora</i> (A. Rich.) Pilg.*       | Cuba, Mariel, <i>Ekman 1032</i> (MO)                               | xxxxxxx* |
| <i>Setaria faberi</i> R.A.W. Herrm.                  | China, Xiushiu, <i>Liu 890105</i> (MO)                             | EU741946 |
| <i>Setaria fiebrigii</i> R.A.W. Herrm. (1)           | Argentina, Entre Rios, <i>F.O. Zuloaga 7044</i> (SI)               | EU741947 |
| <i>Setaria fiebrigii</i> (2)                         | Argentina, Misiones, <i>F.O. Zuloaga 7134</i> (SI)                 | EU741948 |

|                                                  |                                                            |          |
|--------------------------------------------------|------------------------------------------------------------|----------|
| <i>Setaria flavida</i> (Retz.) Veldkamp (1)      | Published GenBank sequence from [27]                       | EF189889 |
| <i>Setaria flavida</i> (2)                       | Published GenBank sequence from [27]                       | EF189890 |
| <i>Setaria flavida</i> (3)                       | Australia, New South Wales, <i>Moore 7584</i> (CANB)       | EU741980 |
| <i>Setaria geminata</i> (Forssk.) Veldkamp (1)** | Published GenBank sequence from [25]                       | AY029662 |
| <i>Setaria geminata</i> (2)*                     | Argentina, Corrientes, <i>S.S. Aliscioni 718</i> (SI)      | xxxxxxx* |
| <i>Setaria globoidea</i> (Domin) R.D. Webster    | Australia, New South Wales, <i>Lloyd 1007</i> (CANB)       | EU741981 |
| <i>Setaria globulifera</i> (Steud.) Griseb.      | Argentina, Entre Ríos, <i>F.O. Zuloaga 7041</i> (SI)       | EU741949 |
| <i>Setaria grandis</i> Stapf                     | Malawi, Chelidini Valley, <i>Phillips 1070</i> (MO)        | EU747688 |
| <i>Setaria grisebachii</i> E. Fourn.             | Published GenBank sequence from [26]                       | AF499141 |
| <i>Setaria hassleri</i> Hack.                    | Argentina, Misiones, <i>S.S. Aliscioni 533</i> (SI)        | EU741950 |
| <i>Setaria homonyma</i> (Steud.) Chiov.          | South Africa, KwaZulu-Natal, <i>E.A. Kellogg 1113</i> (MO) | EU741988 |
| <i>Setaria hunzikeri</i> Anton*                  | Argentina, San Luis, <i>L. Corradi 119</i> (BAA)           | xxxxxxx* |
| <i>Setaria italica</i> (L.) P. Beauv.            | Published GenBank sequence from [26]                       | AF499140 |
| <i>Setaria jubiflora</i> (Trin.) R.D. Webster    | Published GenBank sequence from [27]                       | EF189891 |
| <i>Setaria kagerensis</i> Mez (1)                | Nigeria, Jos Plateau, <i>Tuley 1579</i> (K)                | EU741951 |
| <i>Setaria kagerensis</i> (2)                    | Angola, Maiombe, <i>s.c. 9021</i> (US)                     | EU741971 |

|                                                      |                                                                    |          |
|------------------------------------------------------|--------------------------------------------------------------------|----------|
| <i>Setaria lachnea</i> (Nees) Kunth (1)              | Argentina, Córdoba, <i>L.M. Giussani 327</i> (SI)                  | EU741952 |
| <i>Setaria lachnea</i> (2)                           | Argentina, Misiones, <i>F.O. Zuloaga 6758</i> (SI)                 | EU741953 |
| <i>Setaria leonis</i> (Ekman ex Hitchc.) León*       | Turks & Caicos, South Caicos, <i>D.L. Correll 49273</i> (MO)       | xxxxxxx* |
| <i>Setaria leucopila</i> (Scribn. & Merr.) K. Schum. | Argentina, Salta, <i>M.A. Beilstein 03-127</i> (MO)                | EU741954 |
| <i>Setaria lindenbergiana</i> (Nees) Stapf           | South Africa, Gauteng, <i>E.A. Kellogg 1136</i> (MO)               | EU741994 |
| <i>Setaria longipila</i> E. Fourn. (1)*              | Mexico, Sierra Madre, <i>Rose 2017</i> (US)                        | xxxxxxx* |
| <i>Setaria longipila</i> (2)*                        | Honduras, Depto. Morazán, <i>Molina 3204</i> (US)                  | xxxxxxx* |
| <i>Setaria longiseta</i> P. Beauv.                   | Tanzania, Kigoma, <i>R.E. Gereau 6013</i> (MO)                     | EU741955 |
| <i>Setaria macrostachya</i> Kunth (1)                | Argentina, Córdoba, <i>J. Pensiero 6961</i> (SF)                   | EU747691 |
| <i>Setaria macrostachya</i> (2)                      | Argentina, Salta, <i>O. Morrone 4638</i> (SI)                      | EU741956 |
| <i>Setaria madecassa</i> A. Camus*                   | Madagascar, locality not indicated, <i>M.S. Vorontsova 979</i> (K) | LN908172 |
| <i>Setaria magna</i> Griseb. (1)**                   | Argentina, Corrientes, <i>S.S. Aliscioni 577</i> (SI)              | EU741957 |
| <i>Setaria magna</i> (2)*                            | Argentina, Corrientes, <i>S.S. Aliscioni 707</i> (SI)              | xxxxxxx* |
| <i>Setaria mendocina</i> Phil.                       | Argentina, San Luis, <i>F.O. Zuloaga 8085</i> (SI)                 | EU741958 |
| <i>Setaria nicorae</i> Pensiero (1)                  | Argentina, Formosa, <i>J. Pensiero 6909</i> (SI)                   | EU747686 |
| <i>Setaria nicorae</i> (2)*                          | Argentina, Chaco, <i>S.S. Aliscioni 644</i> (SI)                   | xxxxxxx* |

|                                                           |                                                                     |          |
|-----------------------------------------------------------|---------------------------------------------------------------------|----------|
| <i>Setaria nigrirostris</i> (Nees) T. Durand & Schinz (1) | South Africa, Gauteng, <i>E.A. Kellogg 1140</i> (MO)                | EU741991 |
| <i>Setaria nigrirostris</i> (2)                           | South Africa, Limpopo, <i>E.A. Kellogg 1133</i> (MO)                | EU741992 |
| <i>Setaria nigrirostris</i> (3)                           | South Africa, Limpopo, <i>E.A. Kellogg 1132</i> (MO)                | EU742004 |
| <i>Setaria nigrirostris</i> (4)                           | South Africa, KwaZulu-Natal, <i>E.A. Kellogg 1114</i> (MO)          | EU741989 |
| <i>Setaria nigrirostris</i> (5)                           | Tanzania, Iringa, <i>Greenway &amp; Kanuri 14010</i> (MO)           | EU741941 |
| <i>Setaria nigrirostris</i> (6)                           | South Africa, KwaZulu-Natal, <i>E.A. Kellogg 1120</i> (MO)          | EU741990 |
| <i>Setaria nigrirostris</i> (7)*                          | Madagascar, locality not indicated, <i>M.S. Vorontsova 1641</i> (K) | LN908171 |
| <i>Setaria oblongata</i> (Griseb.) Parodi                 | Argentina, Córdoba, <i>J. Pensiero 6972</i> (SI)                    | EU741959 |
| <i>Setaria orthosticha</i> R.A.W. Herrm.                  | Uganda, Kachwekano, <i>Purseglove 3331</i> (K)                      | EU747690 |
| <i>Setaria palmifolia</i> (J. Koenig) Stapf (1)           | Published GenBank sequence from [26]                                | AF499144 |
| <i>Setaria palmifolia</i> (2)*                            | Published GenBank sequence from [25]                                | AY029680 |
| <i>Setaria pampeana</i> Parodi ex Nicora (1)              | Argentina, Salta, <i>A.M. Cialdella 230</i> (SI)                    | EU741961 |
| <i>Setaria pampeana</i> (2)                               | Argentina, Córdoba, <i>L.M. Giussani 325</i> (SI)                   | EU741960 |
| <i>Setaria parviflora</i> (Poir.) Kerguélen (1)           | Published GenBank sequence from [26]                                | AF499143 |
| <i>Setaria parviflora</i> (2)                             | Published GenBank sequence from [26]                                | AF499142 |

|                                                 |                                                                          |          |
|-------------------------------------------------|--------------------------------------------------------------------------|----------|
| <i>Setaria parviflora</i> (3)                   | Published GenBank sequence from [25]                                     | AY029678 |
| <i>Setaria parviflora</i> (4)                   | Argentina, Entre Ríos, <i>E.R. Guaglianone 3257</i> (SI)                 | EU742003 |
| <i>Setaria parviflora</i> (5)                   | Argentina, Entre Ríos, <i>E.R. Guaglianone 3258</i> (SI)                 | EU742000 |
| <i>Setaria paucifolia</i> (Morong) Lindm.       | Argentina, Corrientes, <i>S.S. Aliscioni 516</i> (SI)                    | EU741962 |
| <i>Setaria perrieri</i> A. Camus*               | Madagascar, locality not indicated, <i>M.S. Vorontsova 1414</i> (K)      | LN908170 |
| <i>Setaria petiolata</i> Stapf & C.E. Hubb.*    | Madagascar, locality not indicated, <i>Grosvenor &amp; Renz 1295</i> (K) | EU741963 |
| <i>Setaria pflanzii</i> Pensiero                | Argentina, Jujuy, <i>J. Pensiero 7056</i> (SI)                           | EU741964 |
| <i>Setaria plicata</i> (Lam.) T. Cooke          | Papua New Guinea, Bougainville, <i>Waterhouse 6145</i> (CANB)            | EU741965 |
| <i>Setaria pumila</i> (Poir.) Roem. & Schult.   | Published GenBank sequence from [27]                                     | EF189894 |
| <i>Setaria punctata</i> (Burm. f.) Veldkamp*    | Locality not indicated, <i>M. Norsangsri 2387</i> (KKU)                  | HE575807 |
| <i>Setaria rara</i> (R. Br.) R.D. Webster (1)** | Australia, Queensland, <i>Bean 4818</i> (CANB)                           | EU741982 |
| <i>Setaria rara</i> (2)*                        | Australia, locality not indicated, <i>M. Lazarides 8298</i> (AD)         | xxxxxxx* |
| <i>Setaria restioidea</i> (Franch.) Stapf       | Central Africa, Bamingui-Bangoran, <i>J.M. Fay 6007</i> (MO)             | EU741967 |
| <i>Setaria retiglumis</i> (Domin) R.D. Webster  | Australia, Darwin, <i>Dunlop 3514</i> (CANB)                             | EU741983 |
| <i>Setaria reverchonii</i> (Vasey) Pilg.*       | United States, Texas, <i>Colquitt 25</i> (US)                            |          |
| <i>Setaria rosengurtii</i> Nicora               | Argentina, Entre Ríos, <i>O. Morrone 5211</i> (SI)                       | EU741968 |

|                                                                         |                                                                     |          |
|-------------------------------------------------------------------------|---------------------------------------------------------------------|----------|
| <i>Setaria sagittifolia</i> (A. Rich.) Walp.*                           | Madagascar, locality not indicated, <i>NOP 207</i> (K)              | MF998496 |
| <i>Setaria scabrifolia</i> (Nees) Kunth                                 | Brazil, Paraná, <i>H.M. Longhi-Wagner 9464</i> (SI)                 | EU741969 |
| <i>Setaria scandens</i> Schrad.                                         | Bolivia, Santa Cruz, <i>O. Morrone 5077</i> (SI)                    | EU741970 |
| <i>Setaria scheelei</i> (Steud.) Hitchc.*                               | United States, Texas, <i>J.R. Swallen 1580</i> (US)                 | xxxxxxx* |
| <i>Setaria scottii</i> (Hack.) A. Camus*                                | Madagascar, locality not indicated, <i>M.S. Vorontsova 1041</i> (K) | MF998501 |
| <i>Setaria sphacelata</i> (Schumach.) Stapf & C.E.<br>Hubb. ex Moss (1) | Published GenBank sequence from [27]                                | EF189893 |
| <i>Setaria sphacelata</i> (2)                                           | South Africa, Mpumalanga, <i>E.A. Kellogg 1126</i> (MO)             | EU741986 |
| <i>Setaria sphacelata</i> (3)                                           | South Africa, KwaZulu-Natal, <i>E.A. Kellogg 1143</i> (MO)          | EU742002 |
| <i>Setaria sphacelata</i> (4)                                           | Argentina, Misiones, <i>F.O. Zuloaga 7222</i> (SI)                  | EU741972 |
| <i>Setaria sphacelata</i> (5)                                           | South Africa, Mpumalanga, <i>E.A. Kellogg 1121</i> (MO)             | EU741997 |
| <i>Setaria sphacelata</i> (6)                                           | South Africa, Eastern Cape, <i>E.A. Kellogg 1104</i> (MO)           | EU742001 |
| <i>Setaria sulcata</i> (Schult.) Kunth (1)                              | South Africa, Mpumalanga, <i>E.A. Kellogg 1122</i> (MO)             | EU741987 |
| <i>Setaria sulcata</i> (2)                                              | South Africa, KwaZulu-Natal, <i>E.A. Kellogg 1110</i> (MO)          | EU741995 |
| <i>Setaria sulcata</i> (3)                                              | South Africa, KwaZulu-Natal, <i>E.A. Kellogg 1112</i> (MO)          | EU741996 |
| <i>Setaria sulcata</i> (4)*                                             | Australia, New South Wales, <i>A. Doust 1368</i> (MO)               | AF499146 |

|                                                    |                                                                          |          |
|----------------------------------------------------|--------------------------------------------------------------------------|----------|
| <i>Setaria sulcata</i> (5)*                        | Australia, New South Wales, <i>A. Doust 1369</i> (MO)                    | AF499147 |
| <i>Setaria sulcata</i> (6)*                        | Locality not indicated, <i>H. Schaefer 2008/378</i> (BM)                 | HE575758 |
| <i>Setaria sulcata</i> (7)*                        | Madagascar, locality not indicated, <i>M.S. Vorontsova 310</i> (K)       | LN908173 |
| <i>Setaria tenacissima</i> Schrad.                 | Bolivia, La Paz, <i>O. Morrone 4860</i> (SI)                             | EU741973 |
| <i>Setaria uda</i> (S.T. Blake) R.D. Webster (1)** | Australia, North Kennedy, <i>M. Lazarides 8165</i> (CANB)                | EU747687 |
| <i>Setaria uda</i> (2)*                            | Australia, locality not indicated, <i>Cowie &amp; Dunlop 7888</i> (CANB) | xxxxxxx* |
| <i>Setaria utowanaea</i> (Scribn.) Pilg. (1)*      | Colombia, La Guajira, <i>P. Bunch 181</i> (MO)                           | xxxxxxx* |
| <i>Setaria utowanaea</i> (2)*                      | Venezuela, Eduardo Miranda, <i>Steyermark 102307</i> (MO)                | xxxxxxx* |
| <i>Setaria vaginata</i> Spreng.                    | Argentina, Misiones, <i>F.O. Zuloaga 7124</i> (SI)                       | EU741974 |
| <i>Setaria variifolia</i> (Swallen) Davidse (1)*   | Mexico, Campeche, <i>E.M. Martínez Salas 27648</i> (MO)                  | xxxxxxx* |
| <i>Setaria variifolia</i> (2)*                     | Mexico, Campeche, <i>E.M. Martínez Salas 27089</i> (MO)                  | xxxxxxx* |
| <i>Setaria vatkeana</i> K. Schum.*                 | Madagascar, locality not indicated, <i>M.S. Vorontsova 1813</i> (K)      | MF998503 |
| <i>Setaria verticillata</i> (L.) P. Beauv. (1)     | Published GenBank sequence from [31]                                     | EF189900 |
| <i>Setaria verticillata</i> (2)                    | South Africa, Gauteng, <i>E.A. Kellogg 1138</i> (MO)                     | EU741985 |
| <i>Setaria verticillata</i> (3)                    | Published GenBank sequence from [32]                                     | AF499139 |
| <i>Setaria verticillata</i> (4)                    | Argentina, Santiago del Estero, <i>J. Pensiero 7082</i> (SF)             | EU741942 |

|                                                     |                                                                     |          |
|-----------------------------------------------------|---------------------------------------------------------------------|----------|
| <i>Setaria verticilliformis</i> Dumort.             | Australia, South Australia, <i>Alcock 192</i> (AD)                  | EU741975 |
| <i>Setaria viridis</i> (L.) P. Beauv.               | Published GenBank sequence from [31]                                | U21976   |
| <i>Setaria vulpiseta</i> (Lam.) Roem. & Schult. (1) | Bolivia, Santa Cruz, <i>O. Morrone 5023</i> (SI)                    | EU741977 |
| <i>Setaria vulpiseta</i> (2)                        | Paraguay, Amambay, <i>F.O. Zuloaga 7293</i> (SI)                    | EU741976 |
| <i>Setaria</i> sp. 1                                | South Africa, Limpopo, <i>E.A. Kellogg 1129</i> (MO)                | EU741998 |
| <i>Setaria</i> sp. 2                                | South Africa, Limpopo, <i>E.A. Kellogg 1130</i> (MO)                | EU741999 |
| <i>Setariopsis auriculata</i> (E. Fourn.) Scribn.*  | Published GenBank sequence from [10]                                | JN604705 |
| <i>Spinifex littoreus</i> (Burm. f.) Merr.          | Australia, Perth, <i>E.A. Kellogg 1021</i> (MO)                     | EU741993 |
| <i>Spinifex sericeus</i> R. Br.                     | Published GenBank sequence from [27]                                | EF189895 |
| <i>Stenotaphrum dimidiatum</i> (L.) Brongn. (1)*    | Locality not indicated, <i>P. Rondeau 04-2005</i> (G)               | AM849189 |
| <i>Stenotaphrum dimidiatum</i> (2)*                 | Madagascar, locality not indicated, <i>M.S. Vorontsova 632</i> (K)  | MF998499 |
| <i>Stenotaphrum oostachyum</i> Baker*               | Madagascar, locality not indicated, <i>M.S. Vorontsova 1042</i> (K) | LN908182 |
| <i>Stenotaphrum secundatum</i> (Walter) Kuntze      | Published GenBank sequence from [25]                                | AY029684 |
| <i>Stenotaphrum unilaterale</i> Baker*              | Madagascar, locality not indicated, <i>M.S. Vorontsova 1043</i> (K) | MF998500 |
| <i>Stereochlaena cameronii</i> (Stapf) Pilg.*       | Published GenBank sequence from [10]                                | JN604708 |
| <i>Uranthoecium truncatum</i> (Maiden & Betche)     | Australia, locality not indicated, <i>S. Jacobs 9599</i> (NSW)      | EU819410 |



|                                                                   |                                                                                |          |
|-------------------------------------------------------------------|--------------------------------------------------------------------------------|----------|
| Stapf (1)                                                         |                                                                                |          |
| <i>Uranthoecium truncatum</i> (2)*                                | Australia, locality not indicated, <i>S.J. &amp; T.R. Hodkinson 9604</i> (TCD) | HE573565 |
| <i>Whiteochloa airoides</i> (R. Br.) Lazarides*                   | Australia, Northern Territory, <i>A.P. Roberts 4023</i> (NT)                   | MG581794 |
| <i>Whiteochloa biciliata</i> Lazarides*                           | Australia, Western Australia, <i>A.A. Mitchell 7974</i> (NT)                   | MG581799 |
| <i>Whiteochloa capillipes</i> (Benth.) Lazarides (1)*             | Published GenBank sequence from [10]                                           | JN604714 |
| <i>Whiteochloa capillipes</i> (2)*                                | Australia, Northern Territory, <i>L.G. Adams 3046</i> (NSW)                    | MG581795 |
| <i>Whiteochloa cymbiformis</i> (Hughes) B.K.<br>Simon*            | Australia, locality not indicated, <i>Glober 20</i> (CANB)                     | MG581797 |
| <i>Whiteochloa multiciliata</i> Lazarides*                        | Australia, Northern Territory, <i>M. Lazarides 100</i> (AD)                    | MG581798 |
| <i>Whiteochloa semitonsa</i> (F. Muell. ex Benth.)<br>C.E. Hubb.* | Australia, Northern Territory, <i>A.A. Mitchell 15642</i> (NT)                 | MG581796 |
| <i>Xerochloa barbata</i> R. Br.*                                  | Australia, locality not indicated, <i>S.J. &amp; T.R. Hodkinson 9323</i> (TCD) | HE573526 |
| <i>Xerochloa laniflora</i> Benth.*                                | Published GenBank sequence from [10]                                           | JN604715 |
| <i>Zuloagaea bulbosa</i> (Kunth) E. Bess (1)                      | United States, New Mexico, <i>E. Bess 41</i> (MO)                              | AY864833 |
| <i>Zuloagaea bulbosa</i> (2)                                      | Published GenBank sequence from [25]                                           | AY029648 |
| <i>Zygochloa paradoxa</i> (R. Br.) S.T. Blake                     | Published GenBank sequence from [27]                                           | EF189897 |

|                                                           |                                                       |          |
|-----------------------------------------------------------|-------------------------------------------------------|----------|
| (female)                                                  |                                                       |          |
| <i>Zygochloa paradoxa</i> (R. Br.) S.T. Blake             | Published GenBank sequence from [27]                  | EF189896 |
| (male)                                                    |                                                       |          |
| <b>Outgroup taxa</b>                                      |                                                       |          |
| <i>Aakia tuerckheimii</i> (Hack.) J.R. Grande             | Mexico, Chiapas, <i>A.L. Cabrera 12312</i> (SI)       | KF982003 |
| <i>Eriochloa acuminata</i> (J. Presl) Kunth               | Mexico, Coahuila, <i>F.O. Zuloaga 9737</i> (SI)       | GU594634 |
| <i>Eriochloa punctata</i> (L.) Desv. ex Ham.              | Argentina, Misiones, <i>F.O. Zuloaga 6838</i> (SI)    | FJ486528 |
| <i>Moorochloa eruciformis</i> (Sm.) Veldkamp              | Argentina, Entre Ríos, <i>F.O. Zuloaga 7045</i> (SI)  | AY188452 |
| <i>Panicum miliaceum</i> L.                               | Published GenBank sequence from [28]                  | AY188472 |
| <i>Rupichloa acuminata</i> (Renvoize) Salariano & Morrone | Brazil, Bahia, <i>F.O. Zuloaga 9029</i> (SI)          | AY029692 |
| <i>Urochloa deflexa</i> (Schumach.) H. Scholz             | Locality not indicated, <i>G. Besnard 47-2006</i> (G) | AM849200 |
| <i>Urochloa panicoides</i> P. Beauv.                      | Mexico, Tejupilco, <i>F.O. Zuloaga 7358</i> (SI)      | FJ486519 |

126

127 Species/accessions not analyzed in [14] and sequences obtained for this study are indicated with an asterisk (\*); species without a defined

128 placement in [14] are indicated with double asterisk (\*\*). Accepted names for *Setaria* species follow [2, 5, 22], and the remainder Cenchrinae

129 taxa plus the outgroup follow [23]; herbarium acronyms follow [24].

130

131 **Table 2. Comparison of different classifications for the taxa of subgenera *Paurochaetium* and *Reverchoniae*, and their currently accepted**  
 132 **names according to [22].**

| [33]                                                            | [3]                                                                           | [34]                                                                             | [5]                                                         | [18]                                                                          |                                                         | Accepted names                                   |
|-----------------------------------------------------------------|-------------------------------------------------------------------------------|----------------------------------------------------------------------------------|-------------------------------------------------------------|-------------------------------------------------------------------------------|---------------------------------------------------------|--------------------------------------------------|
| <i>Panicum</i> subg.<br><i>Paurochaetium</i><br>Hitchc. & Chase | <i>Setaria</i> subg.<br><i>Paurochaetium</i><br>(Hitchc. & Chase)<br>Rominger | <i>Paspalidium</i> Stapf                                                         | <i>Setaria</i> subg.<br><i>Setaria</i>                      | <i>Setaria</i> subg.<br><i>Paurochaetium</i><br>(Hitchc. & Chase)<br>Rominger | <i>Setaria</i> subg.<br><i>Reverchoniae</i><br>W.E. Fox |                                                  |
| <i>Panicum</i><br><i>chapmanii</i> Vasey                        | <i>Setaria chapmanii</i><br>(Vasey) Pilg.                                     | <i>Paspalidium</i><br><i>chapmanii</i> (Vasey)<br>R.W. Pohl                      | <i>Paspalidium</i><br><i>chapmanii</i> (Vasey)<br>R.W. Pohl | <i>Setaria chapmanii</i><br>(Vasey) Pilg.                                     |                                                         | <i>Setaria chapmanii</i><br>(Vasey) Pilg.        |
| <i>Panicum</i><br><i>distantiflorum</i> A.<br>Rich.             | <i>Setaria distantiflora</i><br>(A. Rich.) Pilg.                              | <i>Paspalidium</i><br><i>distantiflorum</i> (A.<br>Rich.) Davidse &<br>R.W. Pohl | <i>Setaria distantiflora</i><br>(A. Rich.) Pilg.            | <i>Setaria</i><br><i>distantiflora</i> (A.<br>Rich.) Pilg.                    |                                                         | <i>Setaria distantiflora</i><br>(A. Rich.) Pilg. |
| <i>Panicum leonis</i><br>Ekman ex Hitchc.                       | <i>Setaria leonis</i><br>(Ekman ex Hitchc.)<br>León                           | <i>Paspalidium leonis</i><br>(Ekman ex Hitchc.)<br>Davidse & R.W. Pohl           | <i>Setaria leonis</i><br>(Ekman ex Hitchc.)<br>León         | <i>Setaria leonis</i><br>(Ekman ex Hitchc.)<br>León                           |                                                         | <i>Setaria leonis</i> (ex<br>Hitchc.) León       |

|                                           |                                                  |                                                                       |                                                  |                                                                              |                                   |                                                                              |
|-------------------------------------------|--------------------------------------------------|-----------------------------------------------------------------------|--------------------------------------------------|------------------------------------------------------------------------------|-----------------------------------|------------------------------------------------------------------------------|
| <i>Panicum pradatum</i> León ex Hitchc.   | <i>Setaria pradana</i> (León ex Hitchc.) León    | <i>Paspalidium pradatum</i> (León ex Hitchc.) Davidse & R.W. Pohl     | <i>Setaria pradana</i> (León ex Hitchc.) León    | <i>Setaria pradana</i> (León ex Hitchc.) León                                |                                   | <i>Setaria pradana</i> (León ex C.L. Hitchc.) León                           |
| <i>Panicum utowanaeum</i> Scribn.         | <i>Setaria utowanaea</i> (Scribn.) Pilg.         | <i>Paspalidium utowanaeum</i> (Scribn.) Davidse & R.W. Pohl           | <i>Setaria utowanaea</i> (Scribn.) Pilg.         | <i>Setaria utowanaea</i> var. <i>utowanaea</i> (Scribn.) Pilg.               |                                   | <i>Setaria utowanaea</i> var. <i>utowanaea</i> (Scribn.) Pilg.               |
| <i>Panicum ophiticola</i> Hitchc. & Ekman | <i>Setaria ophiticola</i> (Hitchc. & Ekman) León | <i>Paspalidium ophiticola</i> (Hitchc. & Ekman) Davidse & R.W. Pohl   | <i>Setaria ophiticola</i> (Hitchc. & Ekman) León | <i>Setaria utowanaea</i> var. <i>ophiticola</i> (Hitchc. & Ekman) W.E. Fox   |                                   | <i>Setaria utowanaea</i> var. <i>ophiticola</i> (Hitchc. & Ekman) W.E. Fox.  |
|                                           | <i>Setaria subtransiens</i> Hitchc. & Ekman      | <i>Paspalidium subtransiens</i> (Hitchc. & Ekman) Davidse & R.W. Pohl | <i>Setaria subtransiens</i> Hitchc. & Ekman      | <i>Setaria utowanaea</i> var. <i>subtransiens</i> (Hitchc. & Ekman) W.E. Fox |                                   | <i>Setaria utowanaea</i> var. <i>subtransiens</i> (Hitchc. & Ekman) W.E. Fox |
| <i>Panicum reverchonii</i> Vasey          | <i>Setaria reverchonii</i> (Vasey) Pilg.         |                                                                       | <i>Setaria reverchonii</i> (Vasey) Pilg.         |                                                                              | <i>Setaria reverchonii</i> subsp. | <i>Setaria reverchonii</i> subsp. <i>reverchonii</i>                         |

|                                            |                                                      |  |                                                      |  |                                                                                             |                                                                                      |
|--------------------------------------------|------------------------------------------------------|--|------------------------------------------------------|--|---------------------------------------------------------------------------------------------|--------------------------------------------------------------------------------------|
|                                            |                                                      |  |                                                      |  | <i>reverchonii</i><br>Vasey) Pilg.                                                          | (Vasey) Pilg.                                                                        |
| <i>Panicum firmulum</i><br>Hitchc. & Chase | <i>Setaria firmula</i><br>(Hitchc. & Chase)<br>Pilg. |  | <i>Setaria firmula</i><br>(Hitchc. & Chase)<br>Pilg. |  | <i>Setaria</i><br><i>reverchonii</i> subsp.<br><i>firmula</i> (Hitchc. &<br>Chase) W.E. Fox | <i>Setaria reverchonii</i><br>subsp. <i>firmula</i><br>(Hitchc. & Chase)<br>W.E. Fox |
| <i>Panicum</i><br><i>ramisetum</i> Scribn. | <i>Setaria ramiseta</i><br>(Scribn.) Pilg.           |  | <i>Setaria ramiseta</i><br>(Scribn.) Pilg.           |  | <i>Setaria</i><br><i>reverchonii</i> subsp.<br><i>ramiseta</i> (Scribn.)<br>W.E. Fox        | <i>Setaria reverchonii</i><br>subsp. <i>ramiseta</i><br>(Scribn.) W.E. Fox           |
|                                            |                                                      |  |                                                      |  | <i>Setaria variifolia</i><br>(Swallen) Davidse                                              | <i>Setaria variifolia</i><br>(Swallen) Davidse                                       |

## 134 **DNA amplification and sequencing**

135 Total genomic DNA was extracted from herbarium material using modified CTAB protocols  
136 from [35]. For the species that failed this protocol, the DNA was isolated using the DNeasy Plant  
137 Mini Kit (Qiagen, Hilden, Germany), following the manufacturer's recommendations. Each species  
138 was amplified from a single voucher specimen but, a second voucher was also included for some  
139 taxa. The *ndhF* gene, coding NADH dehydrogenase subunit F, was amplified by polymerase chain  
140 reaction (PCR) and sequenced for each taxon. The complete region was amplified with a battery of  
141 primers in different combinations in four overlapping fragments using primer pairs specified by [28,  
142 36]: 5F–536R, 536F–972R, 972F–1666R, and 1666F–3R. Due to a lot of samples with a difficult  
143 amplification of the region 1666F–3R, a new reverse primer near the 3R region was designed for  
144 PCR amplification and sequencing of *ndhF* within the subfamily Panicoideae: 2150R (5'–  
145 TCTCCKATACAAAAACYARCAAKAC–3').

146 PCR reactions were performed in a 25 µl final volume with 50–100 ng of template DNA, 5  
147 µl Green Promega GoTaq® buffer (5 u/µl), 0.5 µl MgCl<sub>2</sub> (25 mM), 1.25 µl dNTP (10 mM), 1 µl of  
148 each primer (10 pM), and 0.3 µl of Taq polymerase (5 u/µl) provided by Promega (Madison,  
149 Wisconsin, U.S.A.). Variations in MgCl<sub>2</sub> (0.5–1 µl) and total DNA dilutions (1:5, 1:10 and 1:50)  
150 were used. The reactions were carried out using the following parameters: one cycle of 95 °C for 2  
151 min, 39 cycles of 95 °C for 30 s, 48 °C for 30 s, and 72 °C for 1.5 min, and a final extension cycle  
152 of 72 °C for 10 min. A negative control with no template was included for each series of  
153 amplifications to eliminate the possibility of contamination. PCR products were run out on a 1%  
154 TBE (Tris-Borate-EDTA) agarose gel stained with SYBR Safe DNA gel stain (Invitrogen Life  
155 Technologies) and visualized in a blue-light transilluminator. PCR products were purified and  
156 automated sequencing was performed by Macrogen, Inc. (Seoul, South Korea). Forward and reverse  
157 strands were sequenced for all fragments, with a minimum overlap of 80%.

158

## 159 **Phylogenetic analyses**

160 Sequence editing and assembly were performed with MEGA v. 7.0 [37]. Accuracy of  
161 sequences was assessed by visual inspection of the chromatograms. Alignments were generated  
162 with Clustal X v. 2 [38] under the default settings and were trimmed to remove part of the 3' end,  
163 for which many sequences were incomplete. Point substitutions that caused stop codons or  
164 nonconservative changes in amino acid were checked against the original sequencing trace files. In  
165 some cases, the sequence was eliminated from further analysis at this stage. When necessary, the  
166 alignments obtained were then improved manually using the program MEGA v. 7.0 [37].

167 The phylogenetic reconstruction was based on parsimony (MP) [39], maximum likelihood  
168 (ML) [40–41], and Bayesian inference (BI) [42] methods. In all analyses, gaps were treated as  
169 missing data.

170 Parsimony analyses were performed using TNT ver. 1.1 [43] with Fitch parsimony [39] as  
171 the optimality criterion. All characters were equally weighted and treated as unordered. A heuristic  
172 search was conducted using 1000 random taxon-addition replicates, with the tree-bisection-  
173 reconnection (TBR) algorithm, saving up to 15 trees per replicate to prevent extensive swapping on  
174 islands with many trees. The resulting trees were then used as starting trees for a second-round  
175 search using TBR branch swapping with an upper limit of 10,000 trees. Nonparametric bootstrap  
176 support (BS) was estimated using 10,000 pseudo-replicates, and the same parameters were used in  
177 our MP analyses [44]. Bootstrap percentages of 50 to 80 were considered weak, 81 to 90 moderate,  
178 and > 90 strong.

179 ML analyses were conducted using RAxML-HPC2 on XSEDE (v. 8.2.12) [45] in the  
180 Cyberinfrastructure for Phylogenetic Research (CIPRES) Portal v. 3.3 [46]. For this analysis we  
181 used the implemented algorithm, which allows one to perform optimal tree searches and obtain  
182 bootstrap support [44] in one single analysis [47]. To this end, we performed 1000 bootstrap  
183 replicates with a subsequent search of the maximum likelihood tree, using the GTRGAMMA

184 nucleotide substitution model [45], individual per-site substitution rates (-c), and default setting of  
185 likelihood acceptance (-e), 25 and 0.1, respectively. Bootstrap percentages of 50 to 80 were  
186 considered weak, 81 to 90 moderate, and > 90 strong.

187 Bayesian analyses were performing using MrBayes v. 3.2.7a [48] in the CIPRES Portal [46].  
188 To determinate the best-fitting nucleotide substitution model, data were submitted to jModeltest  
189 2.1.1 [49] and the Akaike information criterion (AIC) selected TVM+I+G. The dataset was  
190 analyzed in two independent runs of 10 million generations, each with four Markov chains (one  
191 cold and three heated chains), sampling every 1000 generations. Convergence of the runs was  
192 assessed by checking the status of parameters in Tracer v.1.7 [50] to ensure the stationarity of each  
193 run. Likelihoods of the trees produced by each run were analyzed graphically using Tracer v.1.7  
194 [50] and, after discarding the initial 2500 trees of each run as burn-in (25%), the remaining trees  
195 (15,002) were used to generate a 50% majority-rule consensus tree. The cutoff for strong support in  
196 the Bayesian analyses was 0.95 (roughly equal to  $p < 0.05$ ) posterior probabilities and values below  
197 0.8 were considered not supported.

198

## 199 **Results**

200 The aligned data matrix for 178 accessions consists of 2077 nucleotide positions, of which  
201 273 characters were phylogenetically informative. The parsimony analyses found 40 trees of 768  
202 steps (uninformative characters excluded), with a consistency index (CI) of 0.464 and a retention  
203 index (RI) of 0.802. The strict consensus tree from MP, the Bayesian 50% majority-rule consensus  
204 tree, and the ML tree all produced similar topologies showing the same strongly supported clades;  
205 thus, only the BI tree is presented here, along with branch support obtained under MP and ML  
206 analyses (Fig 1). The aligned data matrix and trees from the three methods of analysis are available  
207 at Repositorio Institucional CONICET Digital [51]: <http://hdl.handle.net/11336/163438>.

208



209 **Fig 1. Phylogenetic reconstruction of *Setaria* within the subtribe Cenchrinae, based on**  
210 **the chloroplast *ndhF* gene.** Bootstrap supports from parsimony are listed above the branches, and  
211 bootstrap supports from maximum likelihood / posterior probabilities from Bayesian inference are  
212 listed below the branches. Nodes with “–” have bootstrap supports < 50% and the clades denoted by  
213 letters are discussed in the text. Accepted names for *Setaria* species follow [2, 5, 22] and the  
214 remainder Cenchrinae taxa plus the outgroup follow [23].

215

216 For ten taxa we were able to add a second voucher (i.e., *Plagiosetum refractum* (F. Muell.)  
217 Benth., *Setaria atrata* Hack., *S. cernua*, *Setaria geminata* (Forssk.) Veldkamp, *Setaria magna*  
218 Griseb., *Setaria nicorae* Pensiero, *Setaria palmifolia* (J. Koenig) Stapf, *Setaria rara* (R. Br.) R.D.  
219 Webster, *Setaria uda* (S.T. Blake) R.D. Webster, and *Uranthoecium truncatum* (Maiden & Betche)  
220 Stapf), as well as include two accessions for *Setaria longipila* E. Fourn., *Setaria utowanaea*  
221 (Scribn.) Pilg., *Setaria variifolia* (Swallen) Davidse, *Stenotaphrum dimidiatum* (L.) Brongn., and  
222 *Whiteochloa capillipes* (Benth.) Lazarides, four new accessions for the polymorphic *Setaria sulcata*  
223 Raddi (vouchers 4–7), and one more accession for *Setaria nigrirostris* (Nees) T. Durand & Schinz  
224 (voucher 7) (Table 1; Fig 1). With the exception of *S. nicorae* (subclade D) and *W. capillipes*  
225 (“Whiteochloa clade”) whose positions are uncertain, in most cases the two accessions of the same  
226 species had identical or nearly identical sequences and were placed together by the three analyses.  
227 The two accessions of *S. atrata* were separated in the tree but still formed a clade, and in *S. sulcata*  
228 mutations in the sequences led the accessions to distinct placements (i.e., separated into two clades)  
229 (Fig 1).

230 Based on the phylogenetic evidence presented here, the subtribe Cenchrinae sensu [11–12]  
231 is paraphyletic, in agreement with previous results [10, 30, 52]. Our analyses also showed *Setaria* to  
232 be polyphyletic, with its species distributed in at least ten distinct clades (Fig 1). The relationships

233 among clades remains largely unresolved but all combined analyses placed the 32 new accessions  
234 of *Setaria* in six clades and three subclades (A–I; Fig 1), as detailed next.

235 Clades A and B group most of the *Setaria* species considered in the past as *Paspalidium*  
236 [i.e., *Setaria albovillosa* (S.T. Blake) R.D. Webster, *Setaria basiclada* (Hughes) R.D. Webster,  
237 *Setaria chapmanii* (Vasey) Pilg., *Setaria constricta* (Domin) R.D. Webster, *Setaria flavida* (Retz.)  
238 Veldkamp, *Setaria geminata*, *Setaria. globoidea* (Domin) R.D. Webster, *Setaria jubiflora* (Trin.)  
239 R.D. Webster, *Setaria punctata* (Burm. f.) Veldkamp, and *S. uda*]. Within clade A (Bayesian  
240 posterior probability (BPP) 0.94 / ML bootstrap (MLB) 54 / parsimony bootstrap (PB) 60), the two  
241 accessions of *S. uda* (BPP 0.98 / MLB 95 / PB 100) are sister to *S. punctata* (BPP 1 / MLB 96 / PB  
242 100), and both are related to the American *S. chapmanii* (BPP 0.86 / MLB 50 / PB < 50). The two  
243 accessions of *S. geminata* (BPP 1 / MLB 95 / PB 100) are strongly (BI) supported as sister to these  
244 species.

245 Clade B, strongly (BI and MP) supported (BPP 1 / MLB 74 / PB 100), consists of species of  
246 *Setaria* native to Australia and Australasian regions. Although the relationships within this clade are  
247 not clearly defined, *S. basiclada* was sister to *S. constricta* (BPP 1 / MLB 88 / PB 100), as well as *S.*  
248 *albovillosa* resolved as sister to the three accessions of *S. flavida* (BPP 0.97 PP / MLB 54 / PB 82).  
249 The two accessions of *Plagiosetum refractum* (BPP 1 / MLB 97 / PB 100) were resolved as sister  
250 group to all clade B species with a weak branch support in the BI analysis (BPP 0.61).

251 Clades C–E include most of the American *Setaria* species. Within clade C (BPP 0.98 / MLB  
252 < 50 / PB 52), the two accessions of *S. variifolia* were consistently placed together (BPP 1 / MLB  
253 100 / PB 100), as well as the two accessions of *S. cernua* (BPP 1 / MLB 95 / PB 100) closely  
254 related to *Setaria reverchonii* (Vasey) Pilg. (BPP 0.98 / MLB 53 / PB < 50), although their  
255 positions within this clade are unclear. *Setaria leonis* (Ekman ex Hitchc.) León were resolved  
256 closely related to *Setaria scheelei* (Steud.) Hitchc. with almost no support in BI and ML analyses  
257 (BPP 0.51 / MLB < 50) and not recovered in MP. The two accessions of *S. nicorae* remain

258 unresolved, forming part of a polytomy within subclade D strongly supported by MP analysis (BPP  
259 0.87 / MLB < 50 / PB 96). Bayesian and ML approaches also indicated a close relationship between  
260 *Setaria hunzikeri* Anton and *Setaria lachnea* (Nees) Kunth (1), with a moderate (BI) branch support  
261 (BPP 0.86 / MLB 53), but this relationship was not recovered in MP. The two accessions of *S.*  
262 *utowanaea* (BPP 1 / MLB 100 / PB 100) are sister to *Setaria distantiflora* (A. Rich.) Pilg. (BPP  
263 0.99 / MLB 99 / PB 96), and both were resolved as sister clade to all species of subclade D.

264 Clade E was strongly supported only by the BI analysis (BPP 0.98 / MLB 56 / PB 52) and  
265 its members are not related to the species of the larger American clade. It includes *Setaria hassleri*  
266 Hack. sister to *Setaria scandens* Schrad., *Setaria tenacissima* Schrad., and the two accessions of *S.*  
267 *longipila* (BPP 1 / MLB 96 / PB 100), which are grouped in a polytomy (BPP 0.92 / MLB < 50 / PB  
268 < 50). *Setaria restioidea* (Franch.) Stapf is nested with one accession of *S. atrata* (BPP 0.99 / MLB  
269 94 / PB 99), and both are related to *S. atrata* 2 (BPP 0.99 / MLB 60 / PB < 50). This clade was  
270 resolved as sister to all species of clade E (BPP 0.83 / MLB < 50), relationship that was not  
271 supported in MP.

272 Clade F is moderately (BI) supported (BPP 0.87 / MLB 68 / PB 64) and groups most of the  
273 African *Setaria* species. The two accessions of *S. palmifolia* were placed together (BPP 0.98 / MLB  
274 66 / PB 100) in subclade G with *S. sulcata* 7, *Setaria paucifolia* (Morong) Lindm., and *S. sulcata* 5  
275 and 6 supported as its successive sisters (BPP 1 / MLB 95 / PB 100; BPP 0.55 / MLB 90; BPP 1 /  
276 MLB 86 / PB 63; and BPP 1 / MLB 72 / PB 53, respectively). The other four accessions of *S.*  
277 *sulcata* (1–4) were resolved in a polytomy (BPP 0.89 / MLB < 50 / PB < 50) within subclade H  
278 together with the two accessions of *Setaria barbata* (Lam.) Kunth (BPP 0.99 / MLB 88 / PB 93)  
279 and *Setaria lindenbergiana* (Nees) Stapf., *Setaria homonyma* (Steud.) Chiov. and *Setaria plicata*  
280 (Lam.) T. Cooke were resolved as successive sisters to all subclade H species with a moderate  
281 branch support in the BI analysis (BPP 0.85 / MLB 53 / PB 63; BPP 0.83 / MLB < 50 / PB < 50,  
282 respectively).

283 Clade I groups three *Setaria* species restricted to the Madagascar archipelago in a strongly  
284 supported clade by BI and ML analyses (BPP 0.98 / MLB 87 / PB 99). Within this clade, *Setaria*  
285 *madecassa* A. Camus is sister to *Setaria scottii* (Hack.) A. Camus (BPP 1 / MLB 98 / PB 100), and  
286 both are related to *Setaria vatkeana* K. Schum.

287 *Setaria perrieri* A. Camus, *Setaria sagittifolia* (A. Rich.) Walp., *S. magna*, and *S. rara* are  
288 the only four species that have not been consistently assigned/related to any of the retrieved clades  
289 and, consequently, their positions are uncertain. Parsimony and ML analyzes found weak support  
290 (bootstrap < 50) for a sister relationship between *S. perrieri* with “Cenchrus clade” but this  
291 grouping was not supported in BI. Although a second voucher of *S. magna* and *S. rara* were  
292 included here, and the two accessions of each species were strongly supported as sisters (BPP 1 /  
293 MLB 100 / PB 100; BPP 0.99 / MLB 94 / PB 100, respectively), their placements in this phylogeny  
294 remain unclear.

295

## 296 **Discussion**

### 297 **Relationships within *Setaria* and major results**

298 Here the analyzed species of *Setaria* were recovered as a set of at least ten unrelated groups,  
299 consisting mostly of several phylogenetically disparate clades distributed in warm regions around  
300 the world (Fig 1). In addition, as *Setaria* lacks unique distinctive characters, it will need to be  
301 expanded to include some new elements when a solid phylogeny becomes available. Relationships  
302 among species were similar to those shown in previous *ndhF*-based phylogenies [13–14] with  
303 notable differences mainly in the composition of the previously proposed American clades. Here,  
304 most of the American *Setaria* species were resolved in two main clades, one major (clade C,  
305 corresponding to clade X of [14]) and one minor (clade E, corresponding to clade II of [14]), both  
306 morphologically quite distinct. The major clade was originally composed of South American  
307 perennial species; however, due to the placement of some species of the subgenera *Paurochaetium*

308 and *Reverchoniae* (Table 2) within this clade, its range was extended to Central and North America.  
309 Our phylogeny also identified a clade related to the morphology of the species rather than its  
310 geographic origins (clade A), which groups *S. chapmanii*, a taxon previously treated in subgenus  
311 *Paurochaetium* [3] (Fig 1).

312 As expected, the subgenera *Paurochaetium* and *Reverchoniae* (Table 2) are non-  
313 monophyletic (Fig 1) like the other subgenera of *Setaria*. Although they share morphological  
314 similarities, five of the six species analyzed (i.e., *S. distantiflora*, *S. leonis*, *S. reverchonii*, *S.*  
315 *variifolia*, and *S. utowanaea*) were resolved within the major American clade, according to their  
316 geographic origins. Except for *S. distantiflora* sister to *S. utowanaea*, our analyses did not place *S.*  
317 *leonis*, *S. reverchonii*, and *S. variifolia* together, indicating a more distant relationship among them.  
318 On the other hand, *S. chapmanii*, also an American species, was unambiguously strongly supported  
319 within clade A, related to species with inflorescences “Paspalidium type”. While the previously  
320 recognized subgenera *Paurochaetium* and *Reverchoniae* fail to define monophyletic groups in  
321 *Setaria*, they are useful as a way to organize the discussion about relationships of the studied  
322 species. An analysis of the different clades and relationships among species are discussed next.

323

## 324 **Relationships of taxa added in this study**

325 As mentioned earlier, the taxonomic history of subgenera *Paurochaetium* and *Reverchoniae*  
326 are linked that of the genus *Paspalidium*. Species of subgenus *Paurochaetium* were originally  
327 described as a subgenus of *Panicum* [33] to accommodate taxa in which setae are present only at  
328 the ends of the primary branches of the inflorescence. Subgenus *Paurochaetium* was first placed  
329 under *Setaria* at the rank of section by [53], and elevated to subgenus by [3]. Following [33]'s  
330 concept, [17] established the genus *Paspalidium*, segregating it from *Setaria* but, species of  
331 subgenus *Paurochaetium* were transferred to *Paspalidium* only decades later [34]. As the  
332 circumscriptions of the two genera overlap and the distinction between them is somewhat arbitrary,

333 the *Paspalidium* species were transferred back to *Setaria* ([1, 19–20]; see Table 2 for a synopsis of  
334 species and different classifications for the taxa of subgenera *Paurochaetium* and *Reverchoniae*), a  
335 result supported by molecular analyses [10, 13–14].

336 Subgenera *Paurochaetium* (five species) and *Reverchoniae* (two species) (Table 2; [5, 18])  
337 include caespitose perennial plants distributed from the United States (New Mexico, West South  
338 Central, and Florida) to the north of South America (Venezuela and Colombia), being mostly  
339 concentrated in the Caribbean [3, 5, 18, 23, 34]. *Setaria chapmanii*, analyzed here for the first time,  
340 grows on limestone, coral, shell or sandy soils in Florida Keys, the Bahamas, Cuba, and the  
341 Yucatan Peninsula [3]; its panicles have branches with spikelets biseriate, the blunt first glume  
342 turned away from the rachis and the back of the upper lemma toward it, and a single bristle present  
343 below the terminal spikelets [34]. Although this species was previously treated within the subg.  
344 *Paurochaetium* [3], the well-ordered arrangement of its spikelets in unilateral spikes is highly  
345 anomalous in this group [34], as well as the lack of the lower palea [3]. In our phylogeny, *S.*  
346 *chapmanii* is placed in clade A and turned out to be the only species of subg. *Paurochaetium* that is  
347 related to the others previously considered in *Paspalidium* (the remaining species of subg.  
348 *Paurochaetium* were included in clade C).

349 Clade A groups species with inflorescences “*Paspalidium* type” related to wet/aquatic  
350 habitats and, except for *S. chapmanii* which have slender culms, its members are characterized by  
351 having spongy culms [2, 34, 54]. The relationship between *S. chapmanii* and *S. geminata*, for  
352 sharing the same type of environment, has been previously highlighted [34]. *Setaria geminata* is  
353 native to Africa and Asia, introduced unintentionally in tropical and subtropical areas of other  
354 continents [2]. It is an aquatic species with thick and spongy culms, while *S. chapmanii* inhabits  
355 temporary pools and marshes, and is characterized by having culms mostly simple, erect, slender,  
356 and smooth [34, 54]. The spongy culms of *S. geminata* are also shared with *S. punctata* and *S. uda*.  
357 From the former species *S. geminata* is distinguished by having spikelets ovoid and lower palea

358 well-developed while in *S. punctata* the spikelets are ellipsoid and lack lower palea [2]. *Setaria uda*  
359 is a species native to Australia and Papua New Guinea [2] and its position within clade A is  
360 confirmed here by the addition of a second voucher (i.e., *S. uda* 2). It differs from *S. geminata* and  
361 *S. punctata* mainly by having caespitose habit; it lacks rhizomes and has smaller spikelets [2].

362 In [14], *S. magna*, *S. rara* and *Plagiosetum refractum* were resolved as successive sisters to  
363 the “Paspalidium clade” (i.e., clade B), relationships not retrieved by our analyses (with exception  
364 of *Plagiosetum refractum* whose position is poorly supported only by BI). *Setaria rara* is endemic  
365 to Australia, commonly found in arid areas associated with creeks or lagoons [2]. It was previously  
366 included in *Paspalidium* and ML analysis suggested a sister relationship between *S. rara* and clade  
367 B species, although without support (bootstrap < 50). *Setaria rara* is morphologically similar to *S.*  
368 *basiclada*, in that it shares an annual habit [2]; however, its position remains unresolved even with  
369 the addition of a second voucher. *Setaria magna* is also an annual species but it is native to tropical  
370 and subtropical Americas and is morphologically different from *Paspalidium*. It is distinguished  
371 from other species of *Setaria* by its robust aspect with culms as much as 4 m tall and ligules  
372 forming an inverted "V" [5]. Its placement is not yet defined; however, our analyses corroborated  
373 that *S. magna* is not related to the American clades, and suggests a more distant relationship with  
374 clade B species.

375 Clade C groups most of the American perennial species of *Setaria* and, as in previous  
376 studies [13–14], it was retrieved in all analyses. *Setaria cernua*, whose position was unclear in [14],  
377 was consistently supported within this clade, nested with *S. reverchonii*. It is characterized by  
378 having conspicuous superficial rhizomes, tillers with strongly keeled leaves resembling those of  
379 some Iridaceae, lower antherium male with developed anthers, and upper antherium shorter than  
380 the spikelet [5]. This unique combination of characters states led [5] to establish the monotypic  
381 subg. *Cernatum*, which was not supported by our findings, and also disagrees with previous results  
382 [14] which had recovered it in an isolated position.

383 The two species of subg. *Reverchoniae* (Table 2) were also placed in clade C but they do not  
384 appear to be related to each other nor to the subg. *Paurochaetium* taxa. Subgenus *Reverchoniae* was  
385 erected to accommodate species with panicles erect, spikelets randomly disposed on the branches,  
386 and the central inflorescence axis scabrous [18]. *Setaria variifolia* differs from *S. reverchonii*  
387 mainly in having the lower palea well-developed and by the geographic distribution in the Yucatán  
388 peninsula of Mexico and Mesoamerica (vs. Texas, New Mexico, and Oklahoma (United States) and  
389 northern Mexico) [18]; its placement within the larger American clade is confirmed here by  
390 sequencing of two vouchers, but its relationships remain unknown.

391 Within subclade D, *S. leonis* was resolved in a weakly supported position sister to *S.*  
392 *scheelei*, a unexpected result as these species are morphologically very different from each other  
393 and do not grow sympatrically. *Setaria leonis* is endemic to the Caribbean islands, commonly found  
394 on rocky slopes and clearings while *S. scheelei* is native to southwest and south-central United  
395 States to Mexico and prefers shaded habitats on alluvial soils of limestone canyons and river  
396 bottoms [3, 23]. *Setaria leonis* shares the slender culms, geographic distribution and habitats with  
397 *Setaria pradana* (León ex Hitchc.) León [3]; however, we were not able to analyze the latter species  
398 because the *ndhF* failed in all amplification attempts.

399 *Setaria scheelei* has been assigned to subg. *Setaria* [3] and was included in this analysis  
400 since it shares a geographic distribution pattern similar to that of subg. *Paurochaetium*. It is a highly  
401 polymorphic species characterized by having robust aspect, culms usually geniculate at the base,  
402 blades usually flat and pubescent, and the upper lemma short-apiculate, incurved, finely cross-  
403 wrinkled [3]. It is morphologically similar to *Setaria macrostachya* Kunth but our data suggest a  
404 more distant relationship between them, although the position of the latter species in the tree is  
405 unclear.

406 *Setaria hunzikeri*, here analyzed for the first time, was resolved sister to one accession of *S.*  
407 *lachnea*, also within subclade D. The two species are important forage grasses native in South



408 America and are morphologically very similar [5], so their close relationship in our analyses is not  
409 surprising. *Setaria hunzikeri* differs from *S. lachnea* by having hirsute and narrower blades and  
410 smaller inflorescences up to 8 cm long (vs. blades glabrous or scabrous and inflorescences ranging  
411 from 7 to 25 cm long) [5].

412 *Setaria nicorae* was represented in [14]’s phylogeny by a partial sequence and it was placed  
413 in a polytomy together with other South American perennial species. Here, by including a second  
414 voucher with a complete *ndhF* sequence, we confirmed the placement of *S.a nicorae* within the  
415 major American clade but its relationships remain unknown. Morphological similarities between *S.*  
416 *nicorae* and *S. utowanaea* have been noted by [5], mainly by sharing the caespitose habit with  
417 conspicuous rhizomes, spikelets ovoid, and the upper glume 5–7-nerved; however, our analyses  
418 indicated a more distant relationship between them. The latter species is sister to *S. distantiflora* and  
419 both were resolved as sister to all subclade D species but this relationship was recovered only by the  
420 BI analysis and with almost no support. *Setaria distantiflora* and *S. utowanaea* are commonly found  
421 in open, rocky soils; they are morphologically distinct but similar in general aspect. *Setaria*  
422 *distantiflora* is endemic to the Caribbean and is characterized by a caespitose habit, lacking  
423 conspicuous rhizomes, ligules as a fringe of very short hairs, and spikelets lanceolate-ellipsoid  
424 while *S. utowanaea* has short rhizomes, ligules membranous-ciliate, spikelets ovoid and is more  
425 widely distributed (i.e., Caribbean, Colombia to Venezuela) [3, 5].

426 As presented by [14], the minor American clade (clade E) groups annual species with  
427 “bottle-brush inflorescences” (i.e., cylindrical, dense, and continuous spiciform panicles), and both  
428 antrorse and retrorse prickles on the same bristle, the latter indicated as potential morphological  
429 synapomorphy of this clade [14]. In this phylogeny, bootstrap supports for relationships of clade E  
430 are weaker than that retrieved previously, possibly because of the placement of *S. longipila*, here  
431 analyzed for the first time, within this clade. *Setaria longipila* is also an annual species but, its  
432 subspiciform panicles [3] are distinctive. On the other hand, *Setaria grisebachii* E. Fourn., another

433 annual species with inflorescences similar to those of *S. longipila*, is sister to *Setariopsis auriculata*  
434 (E. Fourn.) Scribn. (BPP 0.99 / MLB 75 / PB 61), and are both related to *Zuloagaea bulbosa*  
435 (Kunth) E. Bess. The position of *S. grisebachii* outside clade E will have to be verified by inclusion  
436 of multiple accessions and other morphologically similar American species (e.g., *Setaria liebmanni*  
437 E. Fourn.) in further analyses.

438 Most African *Setaria* species are grouped in clade F but no obvious morphological  
439 characters shared by all members were identified. In [14]' phylogeny, *S. atrata* was represented by  
440 a partial sequence and weakly supported as sister to *S. restioidea* and *S. paucifolia* (Morong)  
441 Lindm. Here, by including a second voucher of *S. atrata* with a complete sequence, we have  
442 confirmed the sister relationship with *S. restioidea*, although its two accessions were not resolved  
443 together; however, our data indicated a more distant relationship among these two species with *S.*  
444 *paucifolia*, as the latter was resolved within subclade G. *Setaria atrata* and *S. restioidea* are found  
445 in swampy places, on clay and saline soils, and their close relationship and morphological  
446 similarities have been previously discussed [2, 14]. *Setaria atrata* is distinguished by having the  
447 upper antherium strongly papillose with transverse wrinkles and lower lemma membranous while  
448 *S. restioidea* has the upper antherium smooth, shiny, finely papillose, lacking prominent wrinkles,  
449 and lower lemma coriaceous [2]. The convolute and rigid blades are also shared with the South  
450 American *S. paucifolia* but our findings suggest that the latter species is related to *S. sulcata* and *S.*  
451 *palmifolia*, which have plicate blades. Although this result is unexpected, it seems that species of  
452 subclade G share not morphology but rather habitats (i.e., they are frequent in moist and shady  
453 places, streambanks, and along forest paths [2, 5]). As we were not able to analyze multiple  
454 vouchers of *S. paucifolia*, the question on the possible Africa–South America disjunction noted by  
455 [14] remains unanswered.

456 The second group with blades plicate is represented in subclade H and consists of an  
457 intricate polymorphic species complex with chromosome counts ranging from  $2n=32$  to  $2n=56$ , and

458  $n=16$  and 18 [55–63]. Several taxa with plicate blades have been synonymized under the name *S.*  
459 *sulcata* due to its apparent substantial plasticity and overlapping of morphological limits and in  
460 geographic distribution [2, 5]. Our sampling included specimens determined as *S. sulcata* (voucher  
461 1), *Setaria poiretiana* (Schult.) Kunth (vouchers 2–5), and *Setaria megaphylla* (Steud.) T. Durand  
462 & Schinz (vouchers 6 and 7). Although our analysis is not conclusive regarding the taxonomic  
463 position of this species complex, the distinct placements of *S. sulcata* in the tree did not support the  
464 recognition of them as a single widespread species, in disagreement with previous results [14].

465 Clade I represents a segregate lineage grouping three species endemic to Madagascar, as  
466 suggested in earlier studies [30]. *Setaria madecassa* and *S. scottii* are found on granite or basaltic  
467 soils of sub-humid savannas [2]. The former species is characterized by having annual caespitose  
468 habit with culms geniculate, panicle open with ascending branches and a single seta below each  
469 spikelet, while *S. scottii* includes perennial plants, with culms decumbent, panicles contracted, and  
470 gibbous spikelets accompanied by a short seta or lacking a seta [2]. *Setaria vatkeana* is an annual  
471 species of forested humid areas, differing by its culms erect and unbranched, blades  
472 pseudopetiolate, sulcate spikelets with a single seta on all of spikelets, and lower lemma indurated,  
473 coriaceous and papillose [2]. *Setaria perrieri* is another endemic species to Madagascar but its  
474 position in this phylogeny remains unresolved. Its weakly supported sister relation to the "Cenchrus  
475 clade" in MP and ML should be considered provisional until confirmed by additional genes and  
476 accessions.

477

## 478 “Cenchrus clade”

479 *Cenchrus* L. is a cosmopolitan genus with approximately 120 species [52] characterized by  
480 having one or several spikelets accompanied by one bristle or surrounded by an involucre of  
481 multiple bristles, or with bristles fused in a cup-like structure [64]. It is monophyletic only when  
482 *Pennisetum* Rich. and the monotypic *Odontelytrum* Hack. are included within it; however, recent

483 molecular phylogenetic studies [30] and our findings showed *Cenchrus* paraphyletic with  
484 *Stereochlaena cameronii* (Stapf) Pilg. embedded in it. *Stereochlaena cameronii* is morphologically  
485 quite distinct from *Cenchrus* in having digitate racemes, imbricate paired spikelets, and lower  
486 lemma awned [23]. Therefore, to reach any decision on the inclusion of this species within  
487 *Cenchrus* its placement in the tree must be confirmed by additional accessions and more variable  
488 markers.

489 *Pseudochaetochloa australiensis* Hitchc., an endemic species to Australia, is considered as a  
490 synonym of *Cenchrus arnhemicus* (F. Muell.) Morrone in [23]; however, this treatment is not  
491 supported by our analyses. Here, *Pseudochaetochloa australiensis* forms a strongly supported clade  
492 with the dioecious Australian *Spinifex* and *Zygochloa*, which corroborates its classification as an  
493 independent genus of *Cenchrus*. *Pseudochaetochloa australiensis* is distinguished from these two  
494 by having monoecious 2-flowered spikelets bearing a single bristle subtending many of the  
495 spikelets, lower antheridium well developed, and both lemmas membranous, similar in size, shape,  
496 and texture [65].

497

### 498 ***Stenotaphrum* Trin.**

499 *Stenotaphrum* is a primarily tropical genus including seven species [23, 66–67] and, as in  
500 *Paspalidium*, its secondary-order inflorescence branches end in a bristle [67]. The placement of  
501 *Stenotaphrum* within subtribe Cenchrinae and its phylogenetic relationships have been uncertain  
502 due to limited data from previous studies (i.e., in [14] it was represented only by *Stenotaphrum*  
503 *secundatum* (Walter) Kuntze). Here, by increasing the number of species sampled (total of four),  
504 our results corroborate the close relationship of *Stenotaphrum* with *Setaria retiglumis* (Domin) R.D.  
505 Webster (syn. *Paspalidium retiglume* (Domin) Hughes) and *Uranthoecium truncatum*, retrieving it  
506 as paraphyletic, as suggested by [30]. *Stenotaphrum* is distinguished from *Setaria*, *Paspalidium* and  
507 the monotypic *Uranthoecium* by having the main inflorescences axis thickened and flattened, with

508 the secondary branches embedded in it [66–67]. *Uranthoecium truncatum* is characterized by  
509 having short lateral branches, disarticulating rachis and truncate glumes, a set of features unique in  
510 this clade. As in previous analyses [14], *Uranthoecium truncatum* was strongly (BI and MP)  
511 supported as related to *S. retiglumis*. Both are caespitose annual species endemic to Australia and  
512 exhibit a very similar foliar anatomy [2, 21], although *S. retiglumis* is morphologically more similar  
513 to the other *Setaria* species.

514

### 515 ***Acritochaete volkensis* Pilg.**

516 The monotypic *Acritochaete volkensis* is an annual species found in shady forests of tropical  
517 Africa [23, 68], currently treated within the subtribe Cenchrinae [11–12]. It has inflorescences  
518 bearing persistent setae, a character state shared with the "bristle clade"; however, our results placed  
519 *Acritochaete volkensis* outside of the Cenchrinae, as also indicated in [30, 52]. Despite the  
520 morphological similarities with Cenchrinae, the photosynthetic C<sub>3</sub> pathway of *Acritochaete*  
521 *volkensis* is unusual within this subtribe, which includes C<sub>4</sub> NADP–ME plants [10, 12]. According  
522 to [30], *Acritochaete* Pilg. is closely related to members of the Boivinellinae Pilg., subtribe known  
523 as “the forest shade clade” [25, 30] and which groups mostly physiologically C<sub>3</sub> genera [10, 12].  
524 Thus, for both subtribes to be monophyletic *Acritochaete volkensis* must be recognized within the  
525 subtribe Boivinellinae.

526

### 527 **Final considerations on the general approach and needs for** 528 **future studies in *Setaria***

529 This article added the missing information on the knowledge of the relationships of the  
530 subgenera *Paurochaetium* and *Reverchoninae*. Although both were not recovered as natural groups,  
531 as the other infrageneric categories of *Setaria*, this step was required since its species had never

532 been analyzed in any previous molecular phylogeny. Here, we were able to clarify many of the  
533 pending questions and identify clades morphologically distinctive not necessarily correlated with  
534 the geographic origin of species as proposed earlier. On the other hand, this paper also shows the  
535 limits of what can be done with a single gene in *Setaria* and Cenchrinae: there are 178 taxa and 273  
536 informative characters, which were not enough to resolve the tree strongly supported. For  
537 estimating bootstrap support, as a general guide, every branch requires at least three mutations to  
538 have confidence in phylogenetic analyses [44]. The problem of too few variable sites affects the MP  
539 and ML analyses in particular and may partly explain the low bootstrap values, since there are not  
540 enough characters. Because Bayesian approaches estimate support in a different way, they are less  
541 susceptible to the limitation of too few characters. Here, the branches with BPP values of 0.98 but  
542 low MLB or PB were supported by only one or two characters (e.g., clades C and E). As we have  
543 completed the *ndhF*-based phylogeny for all existing infrageneric categories within *Setaria*, the next  
544 step is for future studies to use markers that allow capturing more mutations, such as other  
545 chloroplast protein-coding genes or whole plastomes [69–71], and/or low-copy nuclear genes  
546 (LCNGs) [72–73]. As it is well-known that chloroplast genome cannot recover reticulations caused  
547 by allopolyploids and that plastomes phylogenies give an incomplete picture of the history of any  
548 group with hybridization [74–75], the results should be confirmed by studies that include LCNGs,  
549 which hold great potential to improve the robustness of phylogenetic trees [76], and therefore may  
550 be a key to generating a better understanding of the complex relationships in *Setaria*.

551

## 552 **Acknowledgments**

553 The authors thank to Dr. Fernando O. Zuloaga (Instituto de Botánica Darwinion), for his  
554 assistance during the stages of this study, and to Dr. Elizabeth A. Kellogg (Donald Danforth Plant  
555 Science Center), who kindly read our manuscript, for her comments and suggestions that greatly  
556 strengthened the final version.

557

## 558 **References**

- 559 1. Webster RD. Nomenclature of *Setaria* (Poaceae: Paniceae). Sida 1993; 15(3): 447–489.
- 560 2. Morrone O, Aliscioni SS, Veldkamp JF, Pensiero JF, Zuloaga FO, Kellogg EA. Revision of the  
561 Old World Species of *Setaria* (Poaceae: Panicoideae: Paniceae). Syst. Bot. Monogr. 2014; 96:  
562 01–161.
- 563 3. Rominger JM. Taxonomy of *Setaria* (Gramineae) in North America. Illinois Biol. Monogr. 1962;  
564 29: 01–132.
- 565 4. Prasada Rao KE, Wet JMJ, Brink DE, Mengesha MH. Intraspecific variation and systematics of  
566 cultivated *Setaria italica*, foxtail millet (Poaceae). Econ. Bot. 1987; 41: 108–116.
- 567 5. Pensiero JF. Las especies sudamericanas del género *Setaria* (Poaceae, Paniceae). Darwiniana.  
568 1999; 37(1–2): 37–151.
- 569 6. Stapf O, Hubbard OE. *Setaria* P. Beauv. In: Oliver D, editor, Flora of tropical Africa, Gramineae  
570 (Maydeae-Paniceae), vol. 9. Ashford: Reeve & Co; 1930. pp. 768–866.
- 571 7. Callmander MW. Catalogue of the Vascular Plants of Madagascar (Madagascar Catalogue),  
572 Missouri Botanical Garden and Antananarivo [online]. Available from:  
573 <http://legacy.tropicos.org/Project/Madagascar> [accessed 10 February 2022].
- 574 8. BFG (The Brazil Flora Group). Brazilian Flora 2020: Leveraging the power of a collaborative  
575 scientific network. Taxon. 2021; 00: 01–21. DOI: <https://doi.org/10.1002/tax.12640>.
- 576 9. Sousa VF, Santos CAG, Boldrini II. *Setaria* in Flora e Funga do Brasil, Jardim Botânico do Rio  
577 de Janeiro [online]. Available from: <http://floradobrasil.jbrj.gov.br/reflora/floradobrasil/FB13581>  
578 [accessed 10 February 2022].
- 579 10. Morrone O, Aagesen L, Scataglini MA, Salaria DL, Denham SS, Chemisquy MA, et al.  
580 Phylogeny of the Paniceae (Poaceae: Panicoideae): integrating plastid DNA sequences and  
581 morphology into a new classification. Cladistics. 2012; 28(4): 01–24.

- 582 **11.** Soreng RJ, Peterson PM, Romaschenko K, Davidse G, Zuloaga FO, Judziewicz EJ, et al. A  
583 worldwide phylogenetic classification of the Poaceae (Gramineae). *J. Syst. Evol.* 2015; 53(2):  
584 117–137.
- 585 **12.** Soreng RJ, Peterson PM, Zuloaga FO, Romaschenko K, Clark LG, Teisher JK, et al. A  
586 worldwide phylogenetic classification of the Poaceae (Gramineae) III: An update. *J. Syst. Evol.*  
587 2022; 60(3): 476–521.
- 588 **13.** Kellogg EA. Evolution of *Setaria*. In: Doust A, Diao X, editors, *Genetics and Genomics of*  
589 *Setaria*, *Plant Genetics and Genomics: Crops and Models*, vol. 19. New York: Springer, Cham,  
590 Swiss; 2017. pp. 01–27.
- 591 **14.** Kellogg EA, Aliscioni SS, Morrone O, Pensiero J, Zuloaga FO. A phylogeny of *Setaria*  
592 (Poaceae, Panicoideae, Paniceae) and related genera based on the chloroplast gene *ndhF*. *Int. J.*  
593 *Plant Sci.* 2009; 170(1): 117–131.
- 594 **15.** GPWG II (Grass Phylogeny Working Group II). New grass phylogeny resolves deep  
595 evolutionary relationships and discovers C<sub>4</sub> origins. *New Phytol.* 2012; 193(2): 304–312.
- 596 **16.** Clayton WD, Renvoize SA. *Genera Graminum. Grasses of the World*. *Kew. Bull., Addit. Ser.*  
597 1986; 13: 01–389.
- 598 **17.** Stapf O. *Paspalidium*. In: Prain D, editor, *Flora of tropical Africa, Gramineae (Maydeae-*  
599 *Paniceae)*, Ashford: Reeve & Co.; 1920. pp. 582–586.
- 600 **18.** Fox WE, Hatch SL. New combinations in *Setaria* (Poaceae: Paniceae). *Sida.* 1999; 18(4): 1037–  
601 1047.
- 602 **19.** Veldkamp JF. Miscellaneous notes on Southeast Asian Gramineae. IX. *Setaria* and  
603 *Paspalidium*. *Blumea.* 1994; 39(1/2): 373–384.
- 604 **20.** Webster RD. Nomenclatural changes in *Setaria* and *Paspalidium* (Poaceae: Paniceae). *Sida.*  
605 1995; 16(3): 439–446.



- 606 **21.** Aliscioni SS, Ospina JC, Gomiz NE. Morphology and leaf anatomy of *Setaria* s.l. (Poaceae:  
607 Panicoideae: Paniceae) and its taxonomic significance. *Plant. Syst. Evol.* 2016; 302: 173–185.
- 608 **22.** Pensiero JF. *Setaria* P. Beauv. In: Zuloaga FO, Morrone O, Davidse G, Filgueiras TS, Peterson  
609 PM, et al., editors, *Catalogue of New World Grasses (Poaceae): III. Subfamilies Panicoideae,*  
610 *Aristidoideae, Arundinoideae, and Danthonioideae.* Washington, D.C.: Smithsonian Institution;  
611 2003. pp. 46: 569–593.
- 612 **23.** POWO (Plants of the World Online). Facilitated by the Royal Botanic Gardens, Kew [online].  
613 Available from: <http://www.plantsoftheworldonline.org/> [accessed 8 March 2022].
- 614 **24.** Thiers B. *Index Herbariorum: A Global Directory of Public Herbaria and Associated Staff*, New  
615 York Botanical Garden’s Virtual Herbarium, continuously updated [online]. Available from:  
616 <http://sweetgum.nybg.org/science/ih/> [accessed 8 March 2022].
- 617 **25.** Giussani LM, Cota-Sánchez JH, Zuloaga FO, Kellogg EA. A molecular phylogeny of the grass  
618 subfamily Panicoideae (Poaceae) shows multiple origins of C<sub>4</sub> photosynthesis. *Amer. J. Bot.*  
619 2001; 88(11): 1993–2012.
- 620 **26.** Doust AN, Kellogg EA. Inflorescence diversification in the panicoid “bristle grass” clade  
621 (Paniceae, Poaceae): evidence from molecular phylogenies and developmental morphology. *Am.*  
622 *J. Bot.* 2002; 89(8): 1203–1222.
- 623 **27.** Doust AN, Penly AM, Jacobs SWL, Kellogg A. Congruence, conflict and polyploidization  
624 shown by nuclear and chloroplast markers in the monophyletic bristle clade (Paniceae,  
625 Panicoideae, Poaceae). *Syst. Bot.* 2007; 32(3): 531–544.
- 626 **28.** Aliscioni SS, Giussani LM, Zuloaga FO, Kellogg EA. A molecular phylogeny of *Panicum*  
627 (Poaceae: Paniceae). Test of monophyly and phylogenetic placement within the Panicoideae.  
628 *Amer. J. Bot.* 2003; 90(5): 796–821.
- 629 **29.** Kellogg EA, Hiser KM, Doust AN. Taxonomy, phylogeny, and inflorescence development of  
630 the genus *Ixophorus* (Panicoideae: Poaceae). *Int. J. Plant Sci.* 2004; 165(6): 1089–1105.

- 631 **30.** Hackel J, Vorontsova MS, Nanjarisoa OP, Hall RC, Razanatsoa J, Malakasi P, Besnard G.  
632 Grass diversification in Madagascar: in situ radiation of two large C<sub>3</sub> shade clades and support  
633 for a Miocene to Pliocene origin of C<sub>4</sub> grassy biomes. *J. Biogeogr.* 2018; 45: 750–761.
- 634 **31.** Clark LG, Zhang W, Wendel JF. A phylogeny of the grass family (Poaceae) based on *ndhF*  
635 sequence data. *Syst. Bot.* 1995; 20(4): 436–460.
- 636 **32.** Bess EC, Doust AN, Kellogg EA. A naked grass in the “bristle clade”: a phylogenetic and  
637 developmental study of *Panicum* section *Bulbosa* (Paniceae: Poaceae). *Int. J. Plant. Sci.* 2005;  
638 166(3): 371–381.
- 639 **33.** Hitchcock AS, Chase A. The North American species of *Panicum*. *Contr. U.S. Natl. Herb.*  
640 1910; 15: 1–396.
- 641 **34.** Davidse G, Pohl RW. New Taxa and Nomenclatural Combinations of Mesoamerican Grasses  
642 (Poaceae). *Novon.* 1992; 2(2): 81–110.
- 643 **35.** Doyle JJ, Doyle JL. A rapid DNA isolation procedure for small quantities of fresh leaf tissue.  
644 *Phytochem Bull. Bot. Soc. Amer.* 1987; 19(1):11–15.
- 645 **36.** Olmstead RG, Sweere JA. Combining data in phylogenetic systematics: an empirical approach  
646 using three molecular data sets in the Solanaceae. *Syst. Biol.* 1994; 43(4): 467–481.
- 647 **37.** Tamura K, Stecher G, Peterson D, Filipski A., Kumar S. MEGA6: Molecular Evolutionary  
648 Genetics Analysis version 6.0. *Molec. Biol. Evol.* 2013; 30(12): 2725–2729.
- 649 **38.** Larkin MA, Blackshields G, Brown NP, Chenna R, McGettigan PA, McWilliam H, et al.  
650 Clustal W and Clustal X version 2.0. *Bioinformatics.* 2007; 23(21): 2947–2948.
- 651 **39.** Fitch WM. Toward defining the course of evolution: Minimal change for a specific tree  
652 topology. *Syst. Zool.* 1971; 20(4): 406–416.
- 653 **40.** Felsenstein J. Evolutionary trees from DNA sequences: A maximum likelihood approach. *J.*  
654 *Molec. Evol.* 1981; 17(6): 368–376.

- 655 **41.** Huelsenbeck JP, Crandall KA. Phylogeny estimation and hypothesis testing using maximum  
656 likelihood. *Annual Rev. Ecol. Syst.* 1997; 28: 437–466.
- 657 **42.** Huelsenbeck JP, Larget B, Miller RE, Ronquist F. Potential applications and pitfalls of  
658 Bayesian inference of phylogeny. *Syst. Biol.* 2002; 51(5): 673–688.
- 659 **43.** Goloboff PA, Farris JS, Nixon KC. TNT, a free program for phylogenetic analysis. *Cladistics.*  
660 2008; 24(5): 774–786.
- 661 **44.** Felsenstein J. Confidence limits on phylogenies: An approach using the bootstrap. *Evolution.*  
662 1985; 39(4): 783–791.
- 663 **45.** Stamatakis A. RAxML-VI-HPC: Maximum likelihoodbased phylogenetic analyses with  
664 thousands of taxa and mixed models. *Bioinformatics.* 2006; 22(21): 2688–2690.
- 665 **46.** Miller MA, Pfeiffer W, Schwartz T. Creating the CIPRES Science Gateway for inference of  
666 large phylogenetic trees. *Proceedings of the Gateway Computing Environments Workshop*  
667 (GCE), New Orleans. 2010; 01–08.
- 668 **47.** Stamatakis A, Hoover P, Rougemont J. A rapid bootstrap algorithm for the RAxML web-  
669 servers. *Syst. Biol.* 2008; 57(5): 758–771.
- 670 **48.** Ronquist F, Huelsenbeck JP. MrBayes 3: Bayesian phylogenetic inference under mixed models.  
671 *Bioinformatics.* 2003; 19(12): 1572–1574.
- 672 **49.** Darriba D, Taboada GL, Doallo R, Posada D. jModelTest 2: More models, new heuristics and  
673 parallel computing. *Nat. Methods.* 2012; 9(8): 772.
- 674 **50.** Rambaut A, Drummond AJ, Xie D, Baele G, Suchard MA. Posterior summarisation in Bayesian  
675 phylogenetics using Tracer 1.7. *Syst. Biol.* 2018; 67(5): 901–904.
- 676 **51.** Delfini C, Acosta JM, Pensiero JF, Aliscioni, SS. An expanded phylogeny of *Setaria* (Poaceae,  
677 Panicoideae, Paniceae) and its relationships within the subtribe Cenchrinae, Consejo Nacional de  
678 Investigaciones Científicas y Técnicas [dataset online]. Available from:  
679 <http://hdl.handle.net/11336/163438> [accessed 1 August 2022].

- 680 **52.** Gallaher TJ, Peterson PM, Soreng RJ, Zuloaga FO, Li D.-Z, Clark LG, et al. Grasses through  
681 space and time: an overview of the biogeographical and macroevolutionary history of Poaceae. J.  
682 Syst. Evol. 2022; 60(3): 522–569.
- 683 **53.** Pilger R. Gramineae III. Unterfamilie Panicoideae. In: Engler A, Prantl K, editors, Die  
684 Natürlichen Pflanzenfamilien, vol. 14e, Leipzig: W Engelmann, Saxony; 1940. pp. 01–208.
- 685 **54.** Vasey G. New species of grasses. Bull. Torrey. Bot. Club. 1884; 11(6): 61–72.
- 686 **55.** Olorode O. Additional chromosome counts in Nigerian grasses. Brittonia. 1975; 27: 63–68.
- 687 **56.** Mehra PN, Sharma ML. Cytological studies in some central and eastern Himalayan grasses. II.  
688 The Paniceae. Cytologia. 1975; 40:75–89.
- 689 **57.** Sarkar AK, Datta N, Mallick R, Chatterjee U. IOPB chromosome number reports LIV. Taxon.  
690 1976; 25: 648–649.
- 691 **58.** Christopher J, Abraham A. Studies on the cytology and phylogeny of South Indian grasses. III.  
692 Subfamily VI: Panicoideae, tribe Paniceae. Cytologia. 1976; 41: 621–637.
- 693 **59.** Gadella TWJ. Chromosome number reports LVI. Taxon. 1977; 26: 257–274.
- 694 **60.** Dujardin M. Chromosome numbers of some tropical African grasses from western Zaire. Can. J.  
695 Bot. 1978; 56(17): 2138–2152.
- 696 **61.** Freitas-Sacchet AMO. Chromosome number reports LXIX. Taxon. 1980; 29: 703–704.
- 697 **62.** Mehra PN. Cytology of East Indian grasses. Chandigarh: PN Mehra; 1982.
- 698 **63.** Freitas-Sacchet AMO, Boldrini II, Born GG. Cytogenetics and evolution of the native grasses of  
699 Rio Grande do Sul, Brazil, *Setaria* P. Beauv. (Gramineae). Rev. Bras. Genet. 1984; 7(3): 535–  
700 548.
- 701 **64.** Chemisquy MA, Giussani LM, Scataglini MA, Kellogg EA, Morrone O. Phylogenetic studies  
702 favour the unification of *Pennisetum*, *Cenchrus* and *Odontelytrum* (Poaceae): a combined  
703 nuclear, plastid and morphological analysis, and nomenclatural combinations in *Cenchrus*. Ann.  
704 Bot. 2010; 106(1): 107–130.

- 705 **65.** Hitchcock AS. *Pseudochaetochloa*, a new genus of grass from Australia. J. Washington Acad.  
706 Sci. 1924; 14(21): 491–491.
- 707 **66.** Sauer JD. Revision of *Stenotaphrum* (Gramineae: Paniceae) with attention to its historical  
708 geography. Brittonia. 1972; 24(2): 202–222.
- 709 **67.** Webster RD. The Australian Paniceae (Poaceae). Berlin: J. Cramer; 1987.
- 710 **68.** Pilger R. *Acritochaete*, eine neue Gramineen-Gattung aus Afrika. Bot. Jahrb. Syst. 1902; 32(1):  
711 53–55.
- 712 **69.** Cotton JL, Wysocki WP, Clark LG, Kelchner SA, Pires JC, Edger PP, et al. Resolving deep  
713 relationships of PACMAD grasses: A phylogenomic approach. BMC Plant Biology. 2015; 15:  
714 01–11.
- 715 **70.** Burke SV, Wysocki WP, Zuloaga FO, Craine JM, Pires JC, Edger PP, et al. Evolutionary  
716 relationships in Panicoid grasses based on plastome phylogenomics (Panicoideae; Poaceae).  
717 BMC Plant Biology. 2016; 16: 01–11.
- 718 **71.** Saarela JM, Burke SV, Wysocki WP, Barrett MD, Clark LG, Craine JM, et al. A 250 plastome  
719 phylogeny of the grass family (Poaceae): Topological support under different data partitions.  
720 PeerJ. 2018; 2018: e4299.
- 721 **72.** Acosta JM, Zuloaga FO, Reinheimer R. Nuclear phylogeny and hypothesized  
722 allopolyploidization events in the subtribe Otachyriinae (Paspaleae, Poaceae). Syst. Biodivers.  
723 2019; 17(3): 277–294.
- 724 **73.** Huang W, Zhang L, Columbus JT, Hu Y, Zhao Y, Tang L, et al. A well-supported nuclear  
725 phylogeny of Poaceae and implications for the evolution of C<sub>4</sub> photosynthesis. Mol. Plant. 2022;  
726 15(4): 755–777.
- 727 **74.** Estep MC, McKain MR, Diaz DV, Zhong J, Hodge JG, Hodkinson, TR, et al. Allopolyploidy,  
728 diversification, and the Miocene grassland expansion. Proc. Natl. Acad. Sci. U.S.A. 2014;  
729 111(42): 15149–15154.

- 730 **75.** Kellogg EA. Has the connection between polyploidy and diversification actually been tested?  
731 Curr. Opin. Pl. Biol. 2016; 30: 25–32.
- 732 **76.** Sang T. Utility of low-copy nuclear gene sequences in plant phylogenetics. Crit. Rev. Biochem.  
733 Mol. Biol. 2002; 37(3): 121–147.

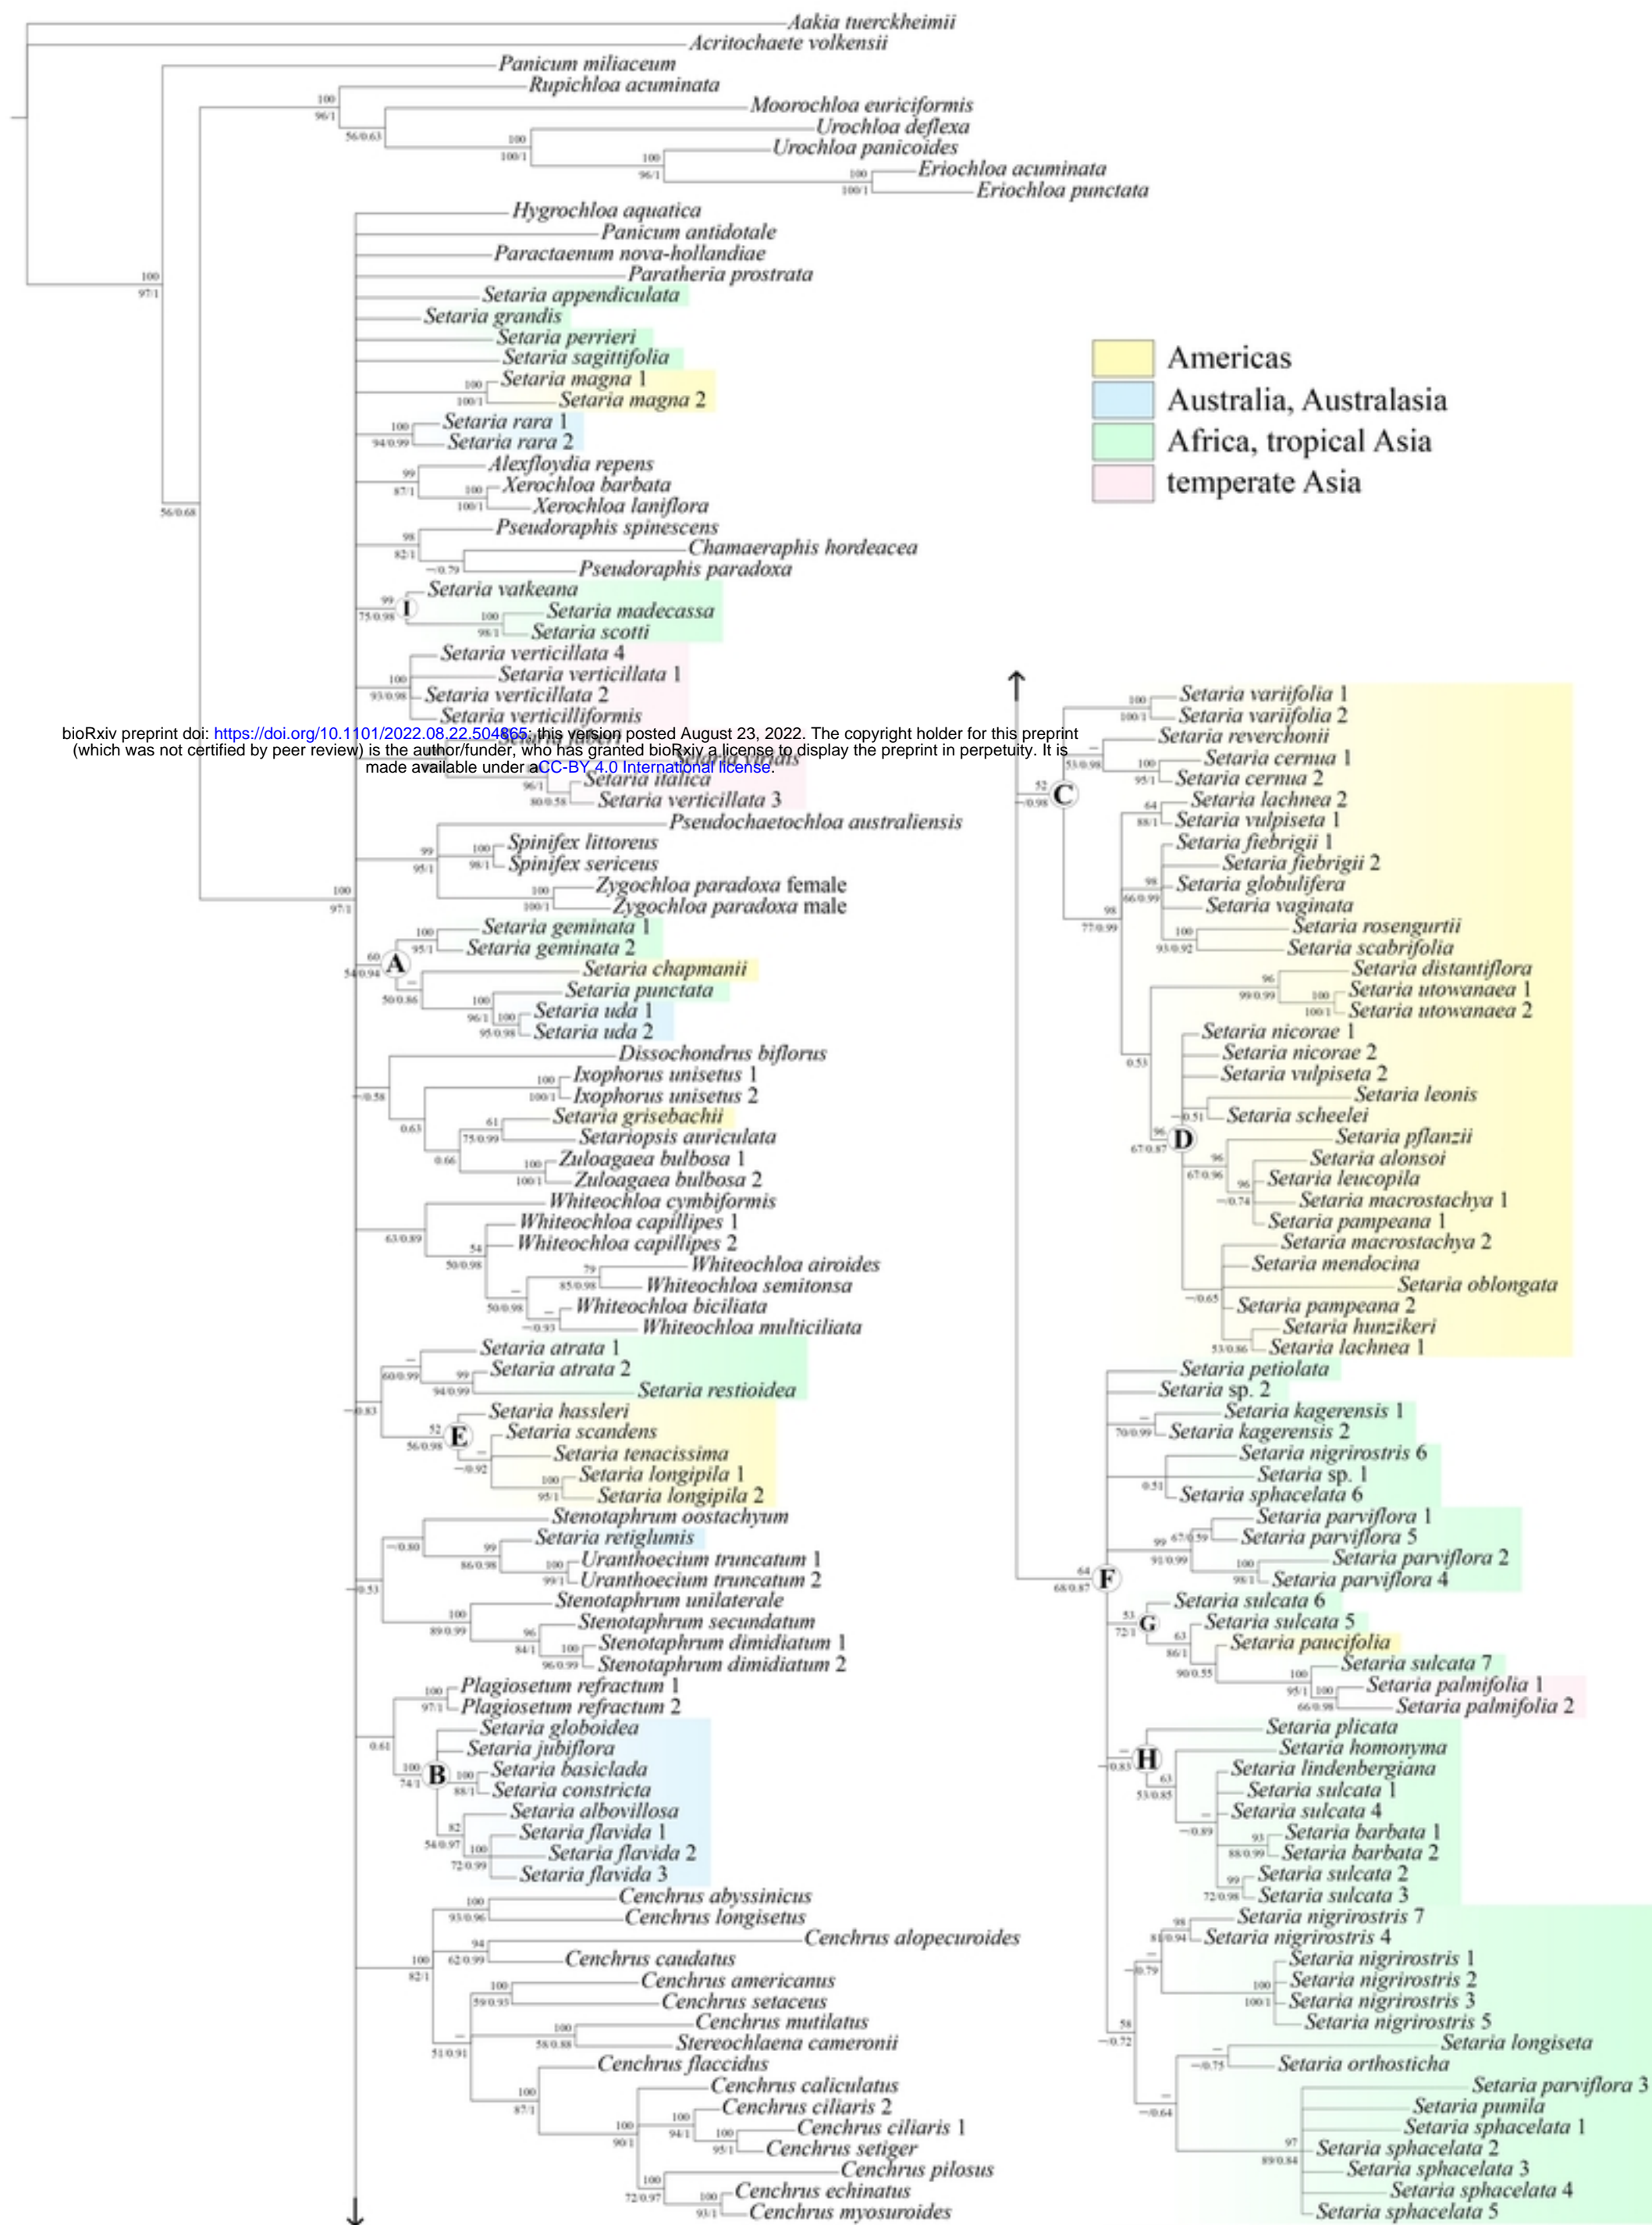

Fig 1
